# Supplementary material for: Assessing the Fitness-for-Purpose of Published Breath Analysis Data: A Quality Assessment Framework for Diabetes Biomarker Research
Source: Research Square preprint supplement (doi:10.21203/rs.3.rs-7455257/v1), 2025-10-08
Supplement: Supplementary file 1 [file 2b115398edf078a396dd9fe1.docx]

Table S1. Overview of Data Quality Assessment Frameworks Categorized by Development Methodology

| Reference | Broad Category of Data Evaluated | Framework Development Methodology | |
| --- | --- | --- | --- |
| **Category 1: Induction and Synthesis from Systematic Literature Reviews** | | |
| Schwabe et al. | Medical data for model training | The METRIC framework, developed from a systematic review of 120 articles, combined with requirements for medical machine learning, and referencing the Wang & Strong framework and EHR/big data frameworks. | |
| Fadahunsi et al. | Electronic health information | A novel Information Quality (IQ) framework, derived from a systematic review and thematic synthesis to identify IQ dimensions in the eHealth domain. | |
| Patone & Zhang | Social media data | A data quality framework based on a systematic summary of two statistical analysis methods for social media data. | |
| Fadahunsi et al. | Digital health technology data | A review of existing information quality frameworks, based on information science theories, data quality models, and ISO standards. | |
| Declerck et al. | Health data (for secondary use) | A review of existing frameworks, based on a systematic analysis of quality assessment methods for the secondary use of health data. | |
| Schmidt et al. | Observational health research data | A data quality framework developed from the evaluation of existing frameworks and a literature review, with an accompanying R software package. | |
| Zhang et al. | Internet of Things (IoT) data | A review of existing frameworks based on ISO/IEC 25012/25024 standards and the requirements of IoT applications. | |
| Ijab et al. | Big data (in the public sector) | The MyPS-ODI framework, based on a systematic literature review and the specific needs of the Malaysian public sector. | |
| Daikeler et al. | Digital social science research data | A review of existing frameworks and a decision tree, based on traditional error models (e.g., Total Survey Error, TSE). | |
| Cichy & Rass | General business data | A review of existing frameworks, focusing on data quality techniques applicable to business environments. | |
| **Category 2: Extension and Contextualization of Existing Authoritative Frameworks** | | |
| Bhana et al. | Public safety data | A public safety data quality standard based on Design Science methodology, the DIKAR model, smart city characteristics, and the Wang & Strong data quality framework. | |
| Zou & Berger | Real-World Data (RWD) (in healthcare) | The ATRACTR screening criteria, based on FDA/EMA data quality frameworks and the FAIR principles. | |
| Shabani et al. | Healthcare data (newborn indicators) | An adaptation of the WHO data quality framework, combined with the EN-MINI tool, for assessing newborn health indicators. | |
| Okwaraji et al. | Healthcare data (low birth weight and preterm birth) | A systematic data quality assessment framework adapted from WHO recommendations for low birth weight and preterm birth data. | |
| Gyrard et al. | Healthcare data (cancer-related) | An interoperability and standardization quality assessment based on health standards (e.g., FHIR, OMOP CDM) and IoT semantic interoperability practices. | |
| Jin et al. | Medical diagnostic study data | Application of the PRISMA guidelines and QUADAS-2 tool to assess diagnostic accuracy based on systematic review methodology standards. | |
| Healy et al. | Health and social care data | A data quality framework based on the ISO 8000 standard, a literature review, and specific requirements for Ireland. | |
| Laberge & Shachak | Sociodemographic data | A quality assessment tool based on the CIHI framework, a literature review, and discussions with Community Health Centre (CHC) staff. | |
| Comero et al. | Environmental monitoring data | The IPCHEM data quality framework, based on the characteristics of chemical monitoring data and US-EPA quality assurance requirements. | |
| **Category 3: Qualitative Methods & Expert Consensus** | | |
| Ng et al. | Health and biomedical datasets | An "AI-readiness" framework developed from qualitative interviews with 20 dataset experts, informed by existing data quality frameworks. | |
| **Category 4: Use-Case Driven Construction** | | |
| Tute et al. | Clinical data (pediatric intensive care) | Sharable measurement methods (MMs) based on a systematic audit of openCQA, analysis of CDSS error cases, data-driven learning, and the HIDQF framework. | |
| Kookal et al. | Dental electronic health record data | An adaptation of the NIHPTC framework, including data element identification, staging, profiling, review, and documentation. | |
| Kuusisto et al. | Healthcare data (palliative care) | The CLIQ framework, covering information utility, usability, and useability, developed through deductive content analysis. | |
| Widad et al. | Big data | An end-to-end data quality anomaly detection framework based on predictive techniques to address shortcomings of existing methods. | |
| McCord et al. | Ecological data | A QA & QC framework based on the DataOne data lifecycle, treating quality assurance and control as a continuous process. | |
| Blacketer et al. | Observational medical data | A standardized data quality assessment method based on a common data model and the needs of real-world evidence generation. | |
| Hillert et al. | Healthcare data (multiple sclerosis) | Harmonized data quality indicators (DQIs) based on data quality assessment principles and the characteristics of multiple sclerosis (MS) data. | |
| Corrales et al. | Datasets for classification tasks | A data quality framework based on data quality theory, data preprocessing techniques, and the requirements of classification tasks. | |
| Jiang et al. | Real-World Data (RWD) (in healthcare) | A suitability assessment based on data element availability, consistency, linkability, and a common data model. | |
| Wirsching et al. | Observational epidemiological study data | The BIOCROSS tool, based on research quality assessment principles and the characteristics of biomarker data. | |
| Nguyen et al. | Big data (in education) | A big data quality management framework based on big data management theories and the specific needs of the education sector. | |
| Deady et al. | Healthcare data (vaccine adverse events) | An EHR data quality framework based on FHIR resource exchange and the research needs for vaccine adverse event studies. | |
| Naik et al. | Nursing quality indicator data | A data quality framework and DQIs based on the assessment needs of the NQuIRE database. | |
| Smith et al. | Administrative data | The MCHP framework, based on practical experience in administrative data research. | |
| Iverson et al. | Healthcare data (metabolic charts) | A suitability assessment based on the completeness and accuracy of the MCAD core outcome set. | |
| **Category 5: Deduction and Construction based on Specific Theories** | | |
| Krishna et al. | Road infrastructure data | A semiotic framework based on syntactic, empirical, semantic, and pragmatic layers of data quality dimensions. | |
| Larburu et al. | Healthcare data (telemedicine) | An ontology based on the impact of technological environmental changes on clinical data quality. | |

Table S2. Literature Search Strategy and Results

| Database | Search date = 04/12/2025 | Number of studies |
| --- | --- | --- |
| PubMed/ MEDLINE | #1 ("Diabetes Mellitus"[Mesh] OR "Diabetes, Gestational"[Mesh] OR "Prediabetic State"[Mesh] OR diabetes mellitus[tiab] OR diabetes[tiab] OR diabetic*[tiab] OR T1DM[tiab] OR T2DM[tiab] OR "gestational diabetes"[tiab] OR prediabet*[tiab]) | 929,046 |
| #2 ("Breath Tests"[Mesh] OR "Exhalation"[Mesh] OR breath[tiab] OR "exhaled air"[tiab] OR "exhaled gas*"[tiab] OR "expired air"[tiab] OR "expired gas*"[tiab] OR exhalation[tiab] OR "breath analysis"[tiab] OR "breath analyses"[tiab] OR "breath test*"[tiab] OR "breath testing"[tiab] OR breathomic*[tiab]) | 72,418 |
| #3 ("Volatile Organic Compounds"[Mesh] OR "volatile organic compound*"[tiab] OR VOC[tiab] OR VOCs[tiab] OR "volatile metabolite*"[tiab]) | 36,779 |
| #4 (#1 AND #2 AND #3) | 103 |
| #5 limit #4 to humans | 82 |
| #6 limit #5 to English language | 82 |
| #7 limit #6 from 2005 to 2025 | 81 |
| Scopus | #1 (diabetes AND mellitus OR diabetes OR diabetic* OR t1dm OR t2dm OR "type 1 diabetes" OR "type 2 diabetes" OR "gestational diabetes" OR prediabetes OR "pre-diabetes" OR "prediabetic state") | 1,275,851 |
| #2 (breath OR "exhaled air" OR "exhaled gas*" OR "expired air" OR "expired gas*" OR exhalation OR "breath analysis" OR "breath analyses" OR "breath test*" OR "breath testing" OR breathomic*) | 114,123 |
| #3 ("volatile organic compound*" OR VOC OR VOCs OR "volatile metabolite*") | 129,730 |
| #4 (#1 AND #2 AND #3) | 260 |
| #5 limit #4 from 2005 to 2025 | 259 |
| #6 Excluded "Editorial" and "Letter" from #5 | 250 |
| Embase | #1 ('diabetes mellitus'/exp OR 'gestational diabetes'/exp OR 'prediabetes'/exp OR 'diabetes mellitus':ti,ab OR diabetes:ti,ab OR diabetic*:ti,ab OR T1DM:ti,ab OR T2DM:ti,ab OR 'gestational diabetes':ti,ab OR prediabet*:ti,ab) | 1,648,112 |
| #2 ('breath analysis'/exp OR 'exhalation'/exp OR breath:ti,ab OR 'exhaled air':ti,ab OR 'exhaled gas*':ti,ab OR 'expired air':ti,ab OR 'expired gas*':ti,ab OR exhalation:ti,ab OR 'breath analysis':ti,ab OR 'breath analyses':ti,ab OR 'breath test*':ti,ab OR 'breath testing':ti,ab OR breathomic*:ti,ab) | 143,818 |
| #3 ('volatile organic compound'/exp OR 'volatile organic compound*':ti,ab OR VOC:ti,ab OR VOCs:ti,ab OR 'volatile metabolite*':ti,ab) | 41,802 |
| #4 (#1 AND #2 AND #3) | 166 |
| #5 limit #4 to humans | 148 |
| #6 limit #5 to from 2005 to 2025 | 147 |
| Web of Science (WoS) Core Collection | #1 TS=(diabetes mellitus OR diabetes OR diabetic* OR T1DM OR T2DM OR "type 1 diabetes" OR "type 2 diabetes" OR "gestational diabetes" OR prediabetes OR "pre-diabetes" OR "prediabetic state") | 857,871 |
| #2 TS=((breath OR "exhaled air" OR "exhaled gas*" OR "expired air" OR "expired gas*" OR exhalation OR "breath analysis" OR "breath analyses" OR "breath test*" OR "breath testing" OR breathomic*)) | 141,135 |
| #3 TS=(("volatile organic compound*" OR VOC OR VOCs OR "volatile metabolite*")) | 115,910 |
| #4 (#1 AND #2 AND #3) | 287 |
| #5 Excluded various non-article document types | 244 |
| #6 limit #5 to from 2005 to 2025 | 242 |
| #7 Limited language to English and Chinese | 234 |

Table S3. Literature Screening Process and Results

| Database Name | No. of Articles After Deduplication  / No. Retrieved | Not Downloaded | Filter 1 | Filter 2 | Citation | Quantitative |
| --- | --- | --- | --- | --- | --- | --- |
| PubMed/MEDLINE | 75/81 | 0 | 19 | 16 | 18 | 22 |
| Embase | 28/147 | 4 | 10 | 8 | 3 | 3 |
| Web of Science (WoS)  Core Collection | 70/234 | 1 | 41 | 8 | 14 | 6 |
| Scopus | 157/250 | 17 | 75 | 14 | 43 | 8 |
| Total | 330/712 | 22 | 145 | 46 | 78 | 39 |

"Filter 1" refers to the first stage of literature screening conducted using a large language model. "Filter 2" refers to the second stage of literature screening, also conducted using a large language model. "Citation" indicates that the data within the article was not original and only included data cited from other research.

Table S4. The QUADAS-2 Signaling Questions Referenced to Hanna et al.'s Version

| Domain | Signaling Question(s) |
| --- | --- |
| Risk of Bias | |
| Patient Selection | • Were sampled patients representative of the intended population?  • Did the study include both positive (benign conditions) as well as healthy controls?  • Did the study avoid inappropriate exclusions? |
| Index Test | • Was the index test and interpretation of data performed in a standardized and reproducible fashion?  • Was validation of results performed (internal or external)? |
| Reference Standard | • Is the reference standard likely to correctly classify the target condition? |
| Flow and Timing | • Was there an appropriate interval between the index test and the reference standard?  • Was diet control performed prior to the index test and reference standard?  • Did all patients receive the same reference standard? <br> • Were all patients included in the analysis? |
| Applicability Concerns | |
| Patient Selection | • Are there concerns that the included patients and setting do not match the review question? |
| Index Test | • Are there concerns that the authors have not demonstrated suitable reproducibility and sensitivity of the chosen index test? |
| Reference Standard | • Are there concerns that the target condition as defined by the reference standard does not match the question? |

Table S5. Detailed Assessment Results for the Included Literature Using the NIM-DBA Framework

| Study | NIM-DBA Process | | | | | | | | |
| --- | --- | --- | --- | --- | --- | --- | --- | --- | --- |
| 1.1 | 2.1 | 2.2 | 2.3 | 3.1 | 3.2 | 4.1 | 4.2 | 4.3 |
| Assessment Criterion -> | Source Credibility | Data Values Completeness | Semantic Consistency | Data Format Consistency | Data Accuracy Assurance | Traceability of Data Values | Data Accuracy Range | Value Credibility | Semantic Data Accuracy |
| Mazzatenta et al. [1] | ✓ | ✓ | ✗ |  |  |  |  |  |  |
| Phillips et al. [2] | ✓ | ✓ | ✗ |  |  |  |  |  |  |
| Greiter et al. [3] | ✓ | ✓ | ✓ | ✗ |  |  |  |  |  |
| Worrall et al. [4] | ✓ | ✓ | ✓ | ✗ |  |  |  |  |  |
| Goerl et al. [5] | ✓ | ✓ | ✓ | ✓ | ✓ | ✓ | ✓ | ✓ | ✓ |
| Kudo et al. [6] | ✓ | ✓ | ✓ | ✓ | ✓ | ✓ | ✓ | ✗ |  |
| Walton et al. [7] | ✓ | ✓ | ✓ | ✓ | ✓ | ✓ | ✓ | ✗ |  |
| Grabowska-Polanowska et al. [8] | ✓ | ✓ | ✓ | ✓ | ✓ | ✓ | ✓ | ✓ | ✗ |
| Xing et al. [9] | ✓ | ✓ | ✓ | ✗ |  |  |  |  |  |
| Iscan et al. [10] | ✓ | ✓ | ✗ |  |  |  |  |  |  |
| Gudiño-Ochoa et al. [11] | ✓ | ✓ | ✓ | ✗ |  |  |  |  |  |
| Ghimenti et al. [12] | ✓ | ✓ | ✓ | ✓ | ✓ | ✓ | ✓ | ✓ | ✓ |
| Yu et al. [13] | ✓ | ✓ | ✓ | ✓ | ✓ | ✓ | ✓ | ✗ |  |
| Fink et al. [14] | ✓ | ✓ | ✓ | ✗ |  |  |  |  |  |
| Yucel et al. [15] | ✓ | ✓ | ✓ | ✗ |  |  |  |  |  |
| Aleksić et al. [16] | ✓ | ✓ | ✓ | ✓ | ✓ | ✓ | ✓ | ✗ |  |
| Yoshinaga et al. [17] | ✓ | ✓ | ✓ | ✓ | ✓ | ✓ | ✓ | ✗ |  |
| Trefz et al. [18] | ✓ | ✓ | ✓ | ✓ | ✓ | ✓ | ✓ | ✗ |  |
| Novak et al. [19] | ✓ | ✓ | ✗ |  |  |  |  |  |  |
| Obermeier et al. [20] | ✓ | ✓ | ✗ |  |  |  |  |  |  |
| Yang et al. [21] | ✓ | ✓ | ✓ | ✓ | ✓ | ✓ | ✓ | ✓ | ✗ |
| Khan et al. [22] | ✓ | ✓ | ✗ |  |  |  |  |  |  |
| Chien et al. [23] | ✓ | ✓ | ✓ | ✓ | ✓ | ✓ | ✓ | ✓ | ✓ |
| Tanda et al. [24] | ✓ | ✓ | ✓ | ✓ | ✓ | ✓ | ✓ | ✗ |  |
| Lekha & Suchetha [25] | ✓ | ✓ | ✓ | ✓ | ✓ | ✓ | ✓ | ✓ | ✓ |
| Parmar et al. [26] | ✓ | ✓ | ✓ | ✗ |  |  |  |  |  |
| Malysheva et al. [27] | ✓ | ✓ | ✓ | ✓ | ✓ | ✓ | ✓ | ✗ |  |
| Saidi et al. [28] | ✓ | ✓ | ✗ |  |  |  |  |  |  |
| Smieja et al. [29] | ✓ | ✓ | ✓ | ✗ |  |  |  |  |  |
| Tazi et al. [30] | ✓ | ✓ | ✗ |  |  |  |  |  |  |
| Sha et al. [31] | ✓ | ✓ | ✓ | ✓ | ✓ | ✓ | ✓ | ✓ | ✓ |
| Yazdankhah et al. [32] | ✓ | ✓ | ✓ | ✓ | ✓ | ✓ | ✓ | ✗ |  |
| Mansouri et al. [33] | ✓ | ✓ | ✗ |  |  |  |  |  |  |
| Manchukutty et al. [34] | ✓ | ✓ | ✓ | ✗ |  |  |  |  |  |
| Samudrala et al. [35] | ✓ | ✓ | ✓ | ✓ | ✓ | ✓ | ✗ |  |  |
| Patel [36] | ✓ | ✓ | ✓ | ✓ | ✓ | ✓ | ✓ | ✗ |  |
| Jiang et al. [37] | ✓ | ✓ | ✓ | ✓ | ✓ | ✓ | ✓ | ✗ |  |
| Li et al. [38] | ✓ | ✓ | ✓ | ✓ | ✓ | ✓ | ✓ | ✓ | ✓ |
| Failures / Assessed | 0 / 38 | 0 / 38 | 9 / 38 | 9 / 29 | 0 / 20 | 0 / 20 | 1 / 20 | 11 / 19 | 2 / 8 |

# References for Supplementary Material

1. Mazzatenta A, Pokorski M, Di Giulio C. Real-time breath analysis in type 2 diabetes patients during cognitive effort. Adv Exp Med Biol. 2013;788 (Mazzatenta A.; Di Giulio C.) Sensorial Physiology Unit, Department of Neuroscience and Imaging, University of Chieti-Pescara “G. d’Annunzio,” Chieti, Italy:247–53. <https://doi.org/10.1007/978-94-007-6627-3-35>.

2. Phillips M, Cataneo RN, Cheema T, Greenberg J. Increased breath biomarkers of oxidative stress in diabetes mellitus. Clin Chim Acta. 2004;344:189–94. <https://doi.org/10.1016/j.cccn.2004.02.025>.

3. Greiter MB, Keck L, Siegmund T, Hoeschen C, Oeh U, Paretzke HG. Differences in exhaled gas profiles between patients with type 2 diabetes and healthy controls. Diabetes Technol Ther. 2010;12:455–63. <https://doi.org/10.1089/dia.2009.0181>.

4. Worrall AD, Qian Z, Bernstein JA, Angelopoulos AP. Water-resistant polymeric acid membrane catalyst for acetone detection in the exhaled breath of diabetics. Anal Chem. 2018;90:1819–26. <https://doi.org/10.1021/acs.analchem.7b03808>.

5. Goerl T, Kischkel S, Sawacki A, Fuchs P, Miekisch W, Schubert JK. Volatile breath biomarkers for patient monitoring during haemodialysis. J Breath Res. 2013;7:17116. <https://doi.org/10.1088/1752-7155/7/1/017116>.

6. Kudo Y, Kino S, Matsuura Y. Vacuum ultraviolet absorption spectroscopy analysis of breath acetone using a hollow optical fiber gas cell. Sens (basel Switz). 2021;21:478. <https://doi.org/10.3390/s21020478>.

7. Walton C, Patel M, Pitts D, Knight P, Hoashi S, Evans M, et al. The use of a portable breath analysis device in monitoring type 1 diabetes patients in a hypoglycaemic clamp: validation with SIFT-MS data. J Breath Res. 2014;8:37108. <https://doi.org/10.1088/1752-7155/8/3/037108>.

8. Grabowska-Polanowska B, Skowron M, Miarka P, Pietrzycka A, Śliwka I. The application of chromatographic breath analysis in the search of volatile biomarkers of chronic kidney disease and coexisting type 2 diabetes mellitus. J Chromatogr, B Anal Technol Biomed Life Sci. 2017;1060:103–10. <https://doi.org/10.1016/j.jchromb.2017.05.030>.

9. Xing R, Xu L, Song J, Zhou C, Li Q, Liu D, et al. Preparation and gas sensing properties of In2O3/Au nanorods for detection of volatile organic compounds in exhaled breath. Sci Rep. 2015;5:10717. <https://doi.org/10.1038/srep10717>.

10. Iscan TA, Ozsin-Ozler C, Ileri-Keceli T, Guciz-Dogan B, Alikasifoglu A, Uzamis-Tekcicek M. Oral health and halitosis among type 1 diabetic and healthy children. J Breath Res. 2020;14:36008. <https://doi.org/10.1088/1752-7163/ab8d8b>.

11. Gudiño-Ochoa A, García-Rodríguez JA, Ochoa-Ornelas R, Cuevas-Chávez JI, Sánchez-Arias DA. Noninvasive diabetes detection through human breath using TinyML-powered E-nose. Sens (basel Switz). 2024;24:1294. <https://doi.org/10.3390/s24041294>.

12. Ghimenti S, Tabucchi S, Lomonaco T, Di Francesco F, Fuoco R, Onor M, et al. Monitoring breath during oral glucose tolerance tests. J Breath Res. 2013;7:17115. <https://doi.org/10.1088/1752-7155/7/1/017115>.

13. Yu L-Q, Su F-H, Ma M-Y, Lv Y-K. Metal-organic frameworks for the sorption of acetone and isopropanol in exhaled breath of diabetics prior to quantitation by gas chromatography. Mikrochim Acta. 2019;186:588. <https://doi.org/10.1007/s00604-019-3713-1>.

14. Fink H, Maihöfer T, Bender J, Schulat J. Indole as a new tentative marker in exhaled breath for non-invasive blood glucose monitoring of diabetic subjects. J Breath Res. 2022;16. <https://doi.org/10.1088/1752-7163/ac4610>.

15. Yucel M, Akin O, Cayoren M, Akduman I, Palaniappan A, Liedberg B, et al. Hand-held volatilome analyzer based on elastically deformable nanofibers. Anal Chem. 2018;90:5122–9. <https://doi.org/10.1021/acs.analchem.7b05187>.

16. Aleksić M, Simeon A, Vujić D, Giannoukos S, Brkić B. Food and lifestyle impact on breath VOCs using portable mass spectrometer-pilot study across european countries. J Breath Res. 2023;17. <https://doi.org/10.1088/1752-7163/ace8b1>.

17. Yoshinaga K, Imasaka T, Imasaka T. Femtosecond laser ionization mass spectrometry for online analysis of human exhaled breath. Anal Chem. 2024;96:11542–8. <https://doi.org/10.1021/acs.analchem.4c02214>.

18. Trefz P, Obermeier J, Lehbrink R, Schubert JK, Miekisch W, Fischer D-C. Exhaled volatile substances in children suffering from type 1 diabetes mellitus: results from a cross-sectional study. Sci Rep. 2019;9:15707. <https://doi.org/10.1038/s41598-019-52165-x>.

19. Novak BJ, Blake DR, Meinardi S, Rowland FS, Pontello A, Cooper DM, et al. Exhaled methyl nitrate as a noninvasive marker of hyperglycemia in type 1 diabetes. Proc Natl Acad Sci U S A. 2007;104:15613–8. <https://doi.org/10.1073/pnas.0706533104>.

20. Obermeier J, Trefz P, Wex K, Sabel B, Schubert JK, Miekisch W. Electrochemical sensor system for breath analysis of aldehydes, CO and NO. J Breath Res. 2015;9:16008. <https://doi.org/10.1088/1752-7155/9/1/016008>.

21. Yang T, Gao D-X, Yu Y-L, Chen M-L, Wang J-H. Dielectric barrier discharge micro-plasma emission spectrometry for the detection of acetone in exhaled breath. Talanta. 2016;146:603–8. <https://doi.org/10.1016/j.talanta.2015.07.074>.

22. Khan MS, Cuda S, Karere GM, Cox LA, Bishop AC. Breath biomarkers of insulin resistance in pre-diabetic hispanic adolescents with obesity. Sci Rep. 2022;12:339. <https://doi.org/10.1038/s41598-021-04072-3>.

23. Chien P-J, Suzuki T, Tsujii M, Ye M, Minami I, Toda K, et al. Biochemical gas sensors (biosniffers) using forward and reverse reactions of secondary alcohol dehydrogenase for breath isopropanol and acetone as potential volatile biomarkers of diabetes mellitus. Anal Chem. 2017;89:12261–8. <https://doi.org/10.1021/acs.analchem.7b03191>.

24. Tanda N, Hinokio Y, Washio J, Takahashi N, Koseki T. Analysis of ketone bodies in exhaled breath and blood of ten healthy japanese at OGTT using a portable gas chromatograph. J Breath Res. 2014;8:46008. <https://doi.org/10.1088/1752-7155/8/4/046008>.

25. Lekha S, Suchetha MS. Real-time non-invasive detection and classification of diabetes using modified convolution neural network. IEEE J Biomed Health Inform. 2018;22:1630–6. <https://doi.org/10.1109/JBHI.2017.2757510>.

26. Parmar S, Ray B, Vishwakarma S, Rath S, Datar S. Polymer modified quartz tuning fork (QTF) sensor array for detection of breath as a biomarker for diabetes. Sens Actuators, B. 2022;358. <https://doi.org/10.1016/j.snb.2022.131524>.

27. Malysheva AO, Baldin MN, Gruznov VM, Blinova LV. Non-laboratory express gas-chromatographic method of human breath analysis with automated graduation. Anal Kontrol. 2018;22:177–85. <https://doi.org/10.15826/analitika.2018.22.2.007>.

28. Saidi T, Zaim O, Moufid M, El Bari N, Ionescu R, Bouchikhi B. Exhaled breath analysis using electronic nose and gas chromatography–mass spectrometry for non-invasive diagnosis of chronic kidney disease, diabetes mellitus and healthy subjects. Sens Actuators, B. 2018;257:178–88. <https://doi.org/10.1016/j.snb.2017.10.178>.

29. Smieja PJ, Lu J, Sun Q, Fu X, Zhang T. Exhaled breath analysis based diabetes detection with k-nearest neighbors classifier. In: Proc. - Int. Symp. Comput. Intell. Des., ISCID. Institute of Electrical and Electronics Engineers Inc.; 2023. p. 126–30. <https://doi.org/10.1109/ISCID59865.2023.00037>.

30. Tazi I, Ainur A, Purwaningrum E, Harini S, Falah F. Design and testing of electronic nose for determining the pattern of bad breath classification in patients with diabetes mellitus and pulmonary tuberculosis (TBC). In: R ON, W ahyudi D, D aryono RNH, Y usnawan E, K ikuchi A, editors. AIP Conf. Proc. American Institute of Physics Inc.; 2019. <https://doi.org/10.1063/1.5115680>.

31. Sha MS, Maurya MR, Shafath S, Cabibihan J-J, Al-Ali A, Malik RA, et al. Breath analysis for the in vivo detection of diabetic ketoacidosis. ACS Omega. 2022;7:4257–66. <https://doi.org/10.1021/acsomega.1c05948>.

32. Yazdankhah F, Tajik L, Faridan M. A simple and effective non-invasive method for the analysis of volatile organic compounds in exhaled air. Microchem J. 2024;207. <https://doi.org/10.1016/j.microc.2024.111683>.

33. Mansouri S, Boulares S, Alhadidi T. Non-invasive measurement of blood glucose by breath analysis. IEEJ Trans Electr Electron Eng. 2020;15:1457–64. <https://doi.org/10.1002/tee.23216>.

34. Manchukutty S, Vasa NJ, Agarwal V, Chandapillai J. Dual photoionization source-based differential mobility sensor for trace gas detection in human breath. IEEE Sensors J. 2015;15:4899–904. <https://doi.org/10.1109/JSEN.2015.2427524>.

35. Samudrala D, Lammers G, Mandon J, Blanchet L, Schreuder THA, Hopman MT, et al. Breath acetone to monitor life style interventions in field conditions: an exploratory study. Obesity. 2014;22:980–3. <https://doi.org/10.1002/oby.20696>.

36. Patel MK. Analysis of volatile organic compounds in breath as a potential diagnostic modality in disease monitoring. 2011.

37. Jiang C, Sun M, Wang Z, Chen Z, Zhao X, Yuan Y, et al. A portable real-time ringdown breath acetone analyzer: toward potential diabetic screening and management. Sens. 2016;16. <https://doi.org/10.3390/s16081199>.

38. Li W, Liu Y, Lu X, Huang Y, Liu Y, Cheng S, et al. A cross-sectional study of breath acetone based on diabetic metabolic disorders. J Breath Res. 2015;9. <https://doi.org/10.1088/1752-7155/9/1/016005>.
