# Supplementary material for: Assessing the Fitness-for-Purpose of Published Breath Analysis Data: A Quality Assessment Framework for Diabetes Biomarker Research
Source: Research Square preprint supplement (doi:10.21203/rs.3.rs-7455257/v1), 2025-10-08
Supplement: Supplementary file 2 [file e5cb03e08d6596a0421666bb.xlsx]

## Sheet: sheet1
Reference	Reference ID	T1DM	T2DM	Diabetes (Type Unspecified)	Control Group	VOC Name	Unit	Data Expression Format	Specific Analytical Method	Method Category	VOC / Unit / Notes	Source Location	Description	Supplementary Notes
Mazzatenta et al., 2013	1	NA	Mean VOCe concentration: 4.32×10⁴ ± 5.15×10³ ppm	NA	Mean VOCe concentration: 5.36×10⁵ ± 3.19×10⁴ ppm	VOCe	ppm	Mean ± Standard Deviation	Metal-Oxide-Semiconductor (MOS) sensor	Chemical sensor / e-nose	(Mean ± SD)	Figure 35.1, custom sensor measurement; described in text	VOCe: Represents "Volatile Organic Compound equivalents". CO2 equivalents: The document states the sensor provides VOC measurements expressed as "ppm CO2 equivalents". This means the sensor (a MOS-type) detects a variety of VOCs, and their combined response is converted into an equivalent carbon dioxide concentration. It is a method of standardizing the mixed effect of multiple substances to the …
	1	NA	4.32×10⁴ ± 8.93×10³	NA	5.36×10⁵ ± 5.53×10³	VOCe	ppm	Mean ± Standard Deviation	Metal-Oxide-Semiconductor (MOS) sensor	Chemical sensor / e-nose	Pre-test	Figure 35.3; described in text
	1	NA	5.84×10⁴ ± 1.22×10⁴	NA	7.38×10⁵ ± 6.96×10⁴	VOCe	ppm	Mean ± Standard Deviation	Metal-Oxide-Semiconductor (MOS) sensor	Chemical sensor / e-nose	During test
	1	NA	3.93×10⁴ ± 1.11×10⁴	NA	5.91×10⁵ ± 1.07×10⁵	VOCe	ppm	Mean ± Standard Deviation	Metal-Oxide-Semiconductor (MOS) sensor	Chemical sensor / e-nose	Post-test
Phillips et al., 2004	2	A significant positive peak area was observed in the carbon chain length range of C7-C11 across methylation sites S1-S5, with mean alveolar gradient values reaching approx. +0.5 to +1.0. Another positive gradient area of about +0.5 was found at methylation sites S1-S3 for longer chain lengths (e.g., C17-C19).	Near methylation site S1, for carbon chain lengths of C5-C7, there was a distinct negative peak (trough), similar to the normal condition, dropping to about -1.0 to -1.5. However, some positive peak areas were also present, such as around methylation sites S1-S3 for carbon chain lengths C9-C11, with values around +0.5. Longer chain lengths (e.g., C15-C19) also showed positive gradients of about +…	NA	A significant negative gradient area (a prominent trough) appeared near carbon chain lengths C5-C7, particularly at methylation sites S1-S3, with mean alveolar gradient values decreasing to approx. -1.0 to -1.5.	Compounds of 'C4-C20 alkanes and monomethylated alkanes'	(Dimensionless value)	Descriptive text	Gas Chromatography-Mass Spectrometry (GC-MS)	Gas Chromatography-Mass Spectrometry (GC-MS)	Mean alveolar gradient	Figure 1	Alveolar Gradient = (Vb/Ib) - (Va/Ia), where Vb is the peak area of the VOC in breath, Ib is the internal standard in breath, Va is the VOC peak area in indoor air, and Ia is the internal standard in indoor air. BMAC is a three-dimensional surface plot.
	2	mean=0.103, S.E.M.=0.119, p<0.01	mean=0.103, S.E.M.=0.047, p<0.05	NA	mean=−0.248, S.E.M.=0.079	Compounds of 'C4-C20 alkanes and monomethylated alkanes'	(Dimensionless value)	Mean ± Standard Error of the Mean (S.E.M.)	Gas Chromatography-Mass Spectrometry (GC-MS)	Gas Chromatography-Mass Spectrometry (GC-MS)	Mean oxidative age (dimensionless)	Figure 2	Meaning: "Oxidative age" is a derived biomarker of oxidative stress, calculated as (O-E)/S, where O is the observed Volume Under the Curve (VUC) of the BMAC, E is the expected VUC for an age-matched normal subject, and S is the standard deviation of (O-E) for all normal subjects. It is a dimensionless quantity expressed in units of standard deviations.
Greiter et al., 2010	3	NA	NA	Median ~4×10³ ncps (25%-75% range: ~2×10³ - 7×10³ ncps)	Median ~1.5×10³ ncps (25%-75% range: ~1×10³ - 2×10³ ncps)	Acetone	ncps (dimensionless)	Median (Interquartile Range)	Proton-Transfer-Reaction Mass Spectrometry (PTR-MS)	Mass Spectrometry (direct injection)	Acetone ncps	Figure 1 and Table 2	ncps stands for "normalized counts per second". It is a common unit for signal intensity in PTR-MS analysis.
	3	NA	NA	Median ~1×10³ ncps (25%-75% range: ~0.7×10³ - 1.5×10³ ncps)	Median ~2.5×10³ ncps (25%-75% range: ~1.8×10³ - 3.5×10³ ncps)	Isoprene	ncps (dimensionless)	Median (Interquartile Range)	Proton-Transfer-Reaction Mass Spectrometry (PTR-MS)	Mass Spectrometry (direct injection)	Isoprene
	3	NA	NA	Median ~1×10² ncps (25%-75% range: ~0.7×10² - 1.5×10² ncps)	Median ~2×10² ncps (25%-75% range: ~1.5×10² - 3×10² ncps)	Dimethyl sulfide	ncps (dimensionless)	Median (Interquartile Range)	Proton-Transfer-Reaction Mass Spectrometry (PTR-MS)	Mass Spectrometry (direct injection)	Dimethyl sulfide
	3	NA	NA	Median ~4×10¹ ncps (25%-75% range: ~3×10¹ - 6×10¹ ncps)	Median ~7×10¹ ncps (25%-75% range: ~5×10¹ - 1×10² ncps)	Butanol	ncps (dimensionless)	Median (Interquartile Range)	Proton-Transfer-Reaction Mass Spectrometry (PTR-MS)	Mass Spectrometry (direct injection)	Butanol
Worrall et al., 2018	4	NA	NA	Mean: ~0.411; Median: 0.30; SD: ~0.276; Min: 0.04; Max: 0.78; Range: 0.74	Mean: ~0.034; Median: 0.02; SD: ~0.036; Min: 0.00; Max: 0.09; Range: 0.09	Acetone	(Dimensionless value)	Mean, Median, Standard Deviation, Range	Optical chemical sensing	Chemical sensor / e-nose	Absorbance (dimensionless)	Figure 7	Absorbance is a dimensionless quantity calculated as A = log10(I0/I). It is sometimes informally labeled "Absorbance Units" (AU), but it has no physical unit. The Y-axis of Figure 7 is labeled "Absorbance at 400nm", indicating the numerical value measured.
Goerl et al., 2013	5	NA	NA	Median: ~550 ppbV; 25th percentile (Q1): ~250 ppbV; 75th percentile (Q3): ~950 ppbV; Lower whisker: ~100 ppbV; Upper whisker: ~1250 ppbV	Median: ~850 ppbV; 25th percentile (Q1): ~550 ppbV; 75th percentile (Q3): ~1250 ppbV; Lower whisker: ~250 ppbV; Upper whisker (excl. outliers): ~2800 ppbV	Acetone	ppbV	Median (percentiles, whisker range)	Headspace Solid-Phase Microextraction Gas Chromatography-Mass Spectrometry (HS-SPME-GC-MS)	Gas Chromatography-Mass Spectrometry (GC-MS)	Exhaled acetone concentration (ppbV)	Figure 5
Kudo et al., 2021	6	NA	NA	NA	0.8 ppm; standard deviation of the measurement was 0.074 ppm; the measurement method itself has a precision of 0.026 ppm	Acetone	ppm	Mean (Standard Deviation, Precision)	Vacuum Ultraviolet (VUV) Absorption Spectroscopy	Spectroscopy	Acetone concentration (ppm)	Described in Abstract	Data from healthy subjects only.
Walton et al., 2014	7	NA	NA	1070 ppbv to 1560 ppbv	NA	Acetone	ppbv	Range	Mixed Metal-Oxide-Semiconductor (MMOS) sensor / Selected-Ion Flow-Tube Mass Spectrometry (SIFT-MS)	Chemical sensor/e-nose / Mass Spectrometry (direct injection)	Breath acetone concentration (ppbv)	Figure 5
	7	NA	NA	2000 Ω to 9700 Ω; data from one patient with a negative correlation was excluded	NA	Mainly acetone, with contributions from other VOCs	Ω (Ohms)	Range	Mixed Metal-Oxide-Semiconductor (MMOS) sensor / Selected-Ion Flow-Tube Mass Spectrometry (SIFT-MS)	Chemical sensor/e-nose / Mass Spectrometry (direct injection)	ΔRmax	Figure 6	Meaning: This represents the maximum change in resistance (ΔRmax) of the MMOS sensor in the "Breathotron" device after exposure to the patient's breath. This change is the sensor's response to VOCs. Unit: Ω (Ohms).
Grabowska-Polanowska et al., 2017	8	NA	Median: 5.963 nmol/L; Range: 0.644 - 21.543 nmol/L; IQR: 7.290 nmol/L	NA	Median: 3.154 nmol/L; Range: 1.092 - 7.194 nmol/L; IQR: 4.854 nmol/L	Acetone	nmol/L	Median (Range, IQR)	Gas Chromatography-Mass Spectrometry (GC-MS) with Thermal Desorption	Gas Chromatography-Mass Spectrometry (GC-MS)	Acetone	Table 3, Figure 3	Molar concentration of VOCs (nmol/L)
	8	NA	Median: 2.931 nmol/L; Range: 0.6240 - 4.6422 nmol/L; IQR: 2.176 nmol/L	NA	Median: 1.849 nmol/L; Range: 0.255 - 3.6916 nmol/L; IQR: 2.019 nmol/L	Isoprene	nmol/L	Median (Range, IQR)	Gas Chromatography-Mass Spectrometry (GC-MS) with Thermal Desorption	Gas Chromatography-Mass Spectrometry (GC-MS)	Isoprene
	8	NA	Median: 0.272 nmol/L; Range: 0.025 - 1.495 nmol/L; IQR: 0.742 nmol/L	NA	Median: < LOD (LOD = 0.025 nmol/L); Range: Not detected; IQR: Not detected	Trimethylamine (TMA)	nmol/L	Median (Range, IQR)	Gas Chromatography-Mass Spectrometry (GC-MS) with Thermal Desorption	Gas Chromatography-Mass Spectrometry (GC-MS)	Trimethylamine (TMA)
	8	NA	Median: 0.064 nmol/L; Range: 0.009 - 0.246 nmol/L; IQR: 0.093 nmol/L	NA	Median: 0.018 nmol/L; Range: 0.003 - 0.027 nmol/L; IQR: 0.013 nmol/L	Methanethiol (MeSH)	nmol/L	Median (Range, IQR)	Gas Chromatography-Mass Spectrometry (GC-MS) with Thermal Desorption	Gas Chromatography-Mass Spectrometry (GC-MS)	Methanethiol (MeSH)
	8	NA	Median: 0.0969 nmol/L; Range: 0.0325 - 0.3984 nmol/L; IQR: 0.1333 nmol/L	NA	Median: 0.0330 nmol/L; Range: 0.0008 - 0.1081 nmol/L; IQR: 0.0489 nmol/L	Dimethyl sulfide (DMS)	nmol/L	Median (Range, IQR)	Gas Chromatography-Mass Spectrometry (GC-MS) with Thermal Desorption	Gas Chromatography-Mass Spectrometry (GC-MS)	Dimethyl sulfide (DMS)
	8	NA	Median: 0.0025 nmol/L; Range: 0.0004 - 0.0506 nmol/L; IQR: 0.0104 nmol/L	NA	Median: 0.0004 nmol/L; Range: 0.0004 - 0.0198 nmol/L; IQR: 0.0008 nmol/L	Carbon disulfide (CS2)	nmol/L	Median (Range, IQR)	Gas Chromatography-Mass Spectrometry (GC-MS) with Thermal Desorption	Gas Chromatography-Mass Spectrometry (GC-MS)	Carbon disulfide (CS2)
Mazzatenta et al., 2013	9	NA	NA	NA	NA	(No data)			Metal-Oxide-Semiconductor (MOS) sensor	Chemical sensor / e-nose	NA		Duplicate of the first reference.
Xing et al., 2015	10	NA	NA	Mean: ~8.0; Range: ~7.5 to 9.0	Mean: ~5.1; Range: ~4.5 to 6.0	Acetone	(Dimensionless value)	Mean (Range)	Chemiresistive sensor (In₂O₃/Au nanorods)	Chemical sensor / e-nose	Sensor Response	Figure 11a	A dimensionless ratio. Sensor response is defined as Ra/Rg, where Ra is the sensor resistance in air and Rg is the resistance in the target gas. Since it is a ratio of two resistances with the same unit (Ohms), the "response" is a dimensionless quantity.
Iscan et al., 2020	11	NA	NA	Mean ± SD: 99.48 ± 47.07 ppb; Median: 98.50 ppb; Min-Max Range: 12-226 ppb	Mean ± SD: 102.88 ± 69.89 ppb; Median: 94.50 ppb; Min-Max Range: 9-410 ppb	VSC (Volatile Sulfur Compounds)	ppb	Mean ± SD, Median, Range	Electrochemical sensor (Halimeter) / Organoleptic assessment	Chemical sensor / e-nose / Other	VSC	Table 5	The measurement is for VSCs, which are a category of VOCs. The text does not specify which sulfur compounds were measured, implying a composite value.
Gudiño-Ochoa et al., 2024	12	NA	NA	Acetone (Rs/Ro value) Range: 22-24	Acetone (Rs/Ro value) Range: 30-32	Acetone	(Dimensionless value)	Range (Sensor response ratio)	e-nose (based on MOS sensor array)	Chemical sensor / e-nose	Rs/Ro value (dimensionless)	Figure 8 and description above it	Rs (Sensor Resistance in Target Gas): Resistance measured when the sensor is exposed to the target gas. Ro (Sensor Resistance in Clean Air): The baseline resistance of the sensor in clean air.
Ghimenti et al., 2013	13	NA	NA	300±40 ppbv	230±20 ppbv	Acetone	ppbv	Mean ± Standard Deviation	Thermal Desorption-Gas Chromatography-Mass Spectrometry (TD-GC-MS)	Gas Chromatography-Mass Spectrometry (GC-MS)	Acetone	Primarily from Abstract, with specific data in Figure 6a	The study divided participants into three groups: diabetic, impaired glucose tolerance (IGT), and healthy. Only data for two groups were extracted.
Yu et al., 2019	14	NA	NA	Mean acetone conc. ± SD: 1336±705 µg·L⁻¹	Mean acetone conc. ± SD: 585±443 µg·L⁻¹	Acetone	µg·L⁻¹	Mean ± Standard Deviation	Thermal Desorption-Gas Chromatography-Flame Ionization Detection (TD-GC-FID)	Gas Chromatography-Other Detectors (GC-Other)	Acetone (ACE)	Reported in "Application to real samples" section, values in Table S1	The grouping was reversed in the main text of the paper; the correct data is in Table S1.
	14	NA	NA	Mean isopropanol conc. ± SD: 26±19 µg·L⁻¹	Mean isopropanol conc. ± SD: 17±13 µg·L⁻¹	Isopropanol (IPA)	µg·L⁻¹	Mean ± Standard Deviation	Thermal Desorption-Gas Chromatography-Flame Ionization Detection (TD-GC-FID)	Gas Chromatography-Other Detectors (GC-Other)	Isopropanol (IPA)
Fink et al., 2022	15	NA	NA	Mean correlation coefficient r (Mean r): -0.39 (negative correlation with BGL)	NA	Indole (tentatively identified) [C₈H₇N+H]⁺	(Dimensionless value)	Mean correlation coefficient	Proton-Transfer-Reaction Time-of-Flight Mass Spectrometry (PTR-TOF-MS)	Mass Spectrometry (direct injection)	Indole (tentatively identified) [C₈H₇N+H]⁺	Table 3	Data Type: Mean or median of Pearson correlation coefficients, representing the degree and direction of linear correlation between VOC signal intensity and BGL. Unit: Unitless (between -1 and +1).
	15	NA	NA	Mean correlation coefficient r (Mean r): 0.37 (positive correlation with BGL)	NA	Formaldehyde	(Dimensionless value)	Mean correlation coefficient	Proton-Transfer-Reaction Time-of-Flight Mass Spectrometry (PTR-TOF-MS)	Mass Spectrometry (direct injection)	Formaldehyde		Based on the quantitative data (mainly correlation coefficient r and significance), Indole is considered the most promising "preliminary" biomarker for non-invasive glucose monitoring.
	15	NA	NA	Mean correlation coefficient r (Mean r): 0.37	NA	Ion fragment (m/z 43.018)	(Dimensionless value)	Mean correlation coefficient	Proton-Transfer-Reaction Time-of-Flight Mass Spectrometry (PTR-TOF-MS)	Mass Spectrometry (direct injection)	Ion fragment (m/z 43.018)		Involves statistical concepts that may require deeper investigation.
	15	NA	NA	Mean correlation coefficient r (Mean r): 0.29	NA	Ion fragment (m/z 57.033)	(Dimensionless value)	Mean correlation coefficient	Proton-Transfer-Reaction Time-of-Flight Mass Spectrometry (PTR-TOF-MS)	Mass Spectrometry (direct injection)	Ion fragment (m/z 57.033)
	15	NA	NA	Mean correlation coefficient r (Mean r): 0.30	NA	Acetone	(Dimensionless value)	Mean correlation coefficient	Proton-Transfer-Reaction Time-of-Flight Mass Spectrometry (PTR-TOF-MS)	Mass Spectrometry (direct injection)	Acetone
	15	NA	NA	Mean correlation coefficient r (Mean r): 0.31	NA	Propionic acid	(Dimensionless value)	Mean correlation coefficient	Proton-Transfer-Reaction Time-of-Flight Mass Spectrometry (PTR-TOF-MS)	Mass Spectrometry (direct injection)	Propionic acid
	15	NA	NA	Mean correlation coefficient r (Mean r): -0.32	NA	Phenol	(Dimensionless value)	Mean correlation coefficient	Proton-Transfer-Reaction Time-of-Flight Mass Spectrometry (PTR-TOF-MS)	Mass Spectrometry (direct injection)	Phenol
Yucel et al., 2018	16	NA	2.9% to 5.3%	NA	0.018	Acetone	(Dimensionless value)	Percentage range	Chemiresistive sensor array	Chemical sensor / e-nose	ΔR/Rb	Figure 7	ΔR/Rb normalized resistivity change.
Aleksić et al., 2023	17	NA	Before Meal (BM): Mean: 441 ppb_v; Median: 438 ppb_v; IQR: 226-485 ppb_v; SD: 351 ppb_v (n=10*)	NA	BM: Mean: 707 ppb_v; Median: 717 ppb_v; IQR: 543-886 ppb_v; SD: 273 ppb_v (n=24)	Acetone	ppbv	Mean, Median, IQR, SD	Membrane Inlet Mass Spectrometry (MIMS)	Mass Spectrometry (direct injection)	Exhaled acetone conc. (ppb)	Table 5, Figure 4	*n=10 participants
	17	NA	After Meal (AM): Mean: 466 ppb_v; Median: 358 ppb_v; IQR: 281-475 ppb_v; SD: 454 ppb_v (n=11)	NA	AM: Mean: 642 ppb_v; Median: 682 ppb_v; IQR: 413-823 ppb_v; SD: 241 ppb_v (n=24)	Acetone	ppbv	Mean, Median, IQR, SD	Membrane Inlet Mass Spectrometry (MIMS)	Mass Spectrometry (direct injection)	Exhaled acetone conc. (ppb)
	17	NA	BM: Mean: 707 ppb_v; Median: 717 ppb_v; IQR: 543-886 ppb_v; SD: 273 ppb_v	NA	Mean: 202 ppb_v; Median: 217 ppb_v; IQR: 111-285 ppb_v; SD: 113 ppb_v	Ethanol	ppbv	Mean, Median, IQR, SD	Membrane Inlet Mass Spectrometry (MIMS)	Mass Spectrometry (direct injection)	Ethanol		n=11 participants
	17	NA	Mean: 473 ppb_v; Median: 478 ppb_v; IQR: 395-578 ppb_v; SD: 125 ppb_v	NA	Mean: 184 ppb_v; Median: 210 ppb_v; IQR: 69-296 ppb_v; SD: 117 ppb_v	Ethanol	ppbv	Mean, Median, IQR, SD	Membrane Inlet Mass Spectrometry (MIMS)	Mass Spectrometry (direct injection)	Ethanol
	17	NA	BM: Mean: 215 ppb_v; Median: 186 ppb_v; IQR: 62-339 ppb_v; SD: 178 ppb_v	NA	BM: Mean: 146 ppb_v; Median: 146 ppb_v; IQR: 104-178 ppb_v; SD: 51 ppb_v	Isoprene	ppbv	Mean, Median, IQR, SD	Membrane Inlet Mass Spectrometry (MIMS)	Mass Spectrometry (direct injection)	Isoprene
	17	NA	AM: Mean: 182 ppb_v; Median: 171 ppb_v; IQR: 74-278 ppb_v; SD: 136 ppb_v	NA	AM: Mean: 143 ppb_v; Median: 142 ppb_v; IQR: 107-182 ppb_v; SD: 56 ppb_v	Isoprene	ppbv	Mean, Median, IQR, SD	Membrane Inlet Mass Spectrometry (MIMS)	Mass Spectrometry (direct injection)	Isoprene
	17	NA	BM: Mean: 20 ppb_v; Median: 14 ppb_v; IQR: 7-16 ppb_v; SD: 30 ppb_v	NA	BM: Mean: 16 ppb_v; Median: 17 ppb_v; IQR: 9-23 ppb_v; SD: 10 ppb_v	n-Pentane	ppbv	Mean, Median, IQR, SD	Membrane Inlet Mass Spectrometry (MIMS)	Mass Spectrometry (direct injection)	n-Pentane
	17	NA	AM: Mean: 13 ppb_v; Median: 13 ppb_v; IQR: 9-16 ppb_v; SD: 6 ppb_v	NA	AM: Mean: 14 ppb_v; Median: 16 ppb_v; IQR: 3-22 ppb_v; SD: 8 ppb_v	n-Pentane	ppbv	Mean, Median, IQR, SD	Membrane Inlet Mass Spectrometry (MIMS)	Mass Spectrometry (direct injection)	n-Pentane
Yoshinaga et al., 2024	18	NA	NA	NA	Subject A: 0.30±0.03 ppm; Subject B: 0.34±0.04 ppm; Subject C: 0.30±0.02 ppm; Mean of three subjects: 0.31 ppm	Acetone	ppm	Mean ± SD (inferred)	Femtosecond Laser Ionization Mass Spectrometry (fs-LIMS)	Mass Spectrometry (direct injection)	Acetone (ppm)	Supplementary Material S10	Test data is from healthy samples only; data for diabetic patients is cited from other sources.
Trefz et al., 2019	19	T1DM (n=53): 1223 (range: 481-15011); HbA1c < 8%: 924 (481-2509); HbA1c > 8%: 1607 (686-15011)	NA	NA	Healthy (n=60): 784 (range: 287-28,963)	Isopropanol	ppbv	Median (range)	Proton-Transfer-Reaction Time-of-Flight Mass Spectrometry (PTR-TOF-MS)	Mass Spectrometry (direct injection)	Isopropanol (ppbv)	Table 2, Figure 3	Superscripts (a,b,c,d) indicate significant differences between groups: a: healthy vs. patients; b: healthy vs. good control (HbA1c < 8%); c: healthy vs. poor control (HbA1c > 8%)
	19	T1DM (n=53): 238 (range: 204-256); HbA1c < 8%: 238 (211-256); HbA1c > 8%: 240 (204-255)	NA	NA	Healthy (n=60): 232 (range: 186-306)	Acetone	ppbV	Median (range)	Proton-Transfer-Reaction Time-of-Flight Mass Spectrometry (PTR-TOF-MS)	Mass Spectrometry (direct injection)	Acetone (ppbV)
	19	T1DM (n=53): 171 (range: 44.7-1856); HbA1c < 8%: 150 (71.6-1203); HbA1c > 8%: 221 (44.7-1856)	NA	NA	Healthy (n=60): 82.4 (range: 20.7-554)	Ethanol	ppbV	Median (range)	Proton-Transfer-Reaction Time-of-Flight Mass Spectrometry (PTR-TOF-MS)	Mass Spectrometry (direct injection)	Ethanol
	19	T1DM (n=53): 19.6 (range: 6.49-77.2); HbA1c < 8%: 20.0 (4.53-89.6); HbA1c > 8%: 17.1 (4.28-44.1)	NA	NA	Healthy (n=60): 11.3 (range: 0.99-151)	DMS (Dimethyl sulfide)	ppbV	Median (range)	Proton-Transfer-Reaction Time-of-Flight Mass Spectrometry (PTR-TOF-MS)	Mass Spectrometry (direct injection)	DMS
	19	T1DM (n=53): 112 (range: 8.36-291); HbA1c < 8%: 105 (49.0-291); HbA1c > 8%: 118 (8.36-265)	NA	NA	Healthy (n=60): 49.6 (range: 7.44-153)	Isoprene	ppbV	Median (range)	Proton-Transfer-Reaction Time-of-Flight Mass Spectrometry (PTR-TOF-MS)	Mass Spectrometry (direct injection)	Isoprene
	19	T1DM (n=53): 13.5 (range: 6.11-101); HbA1c < 8%: 10.6 (6.11-30.9); HbA1c > 8%: 16.2 (8.27-101)	NA	NA	Healthy (n=60): 5.30 (range: 1.36-36.9)	Pentanal	ppbV	Median (range)	Proton-Transfer-Reaction Time-of-Flight Mass Spectrometry (PTR-TOF-MS)	Mass Spectrometry (direct injection)	Pentanal (ppbV)
	19	T1DM (n=53): 66.7 (range: 13.9-513); HbA1c < 8%: 66.7 (14.8-513); HbA1c > 8%: 66.8 (13.9-209)	NA	NA	Healthy (n=60): 51.8 (range: 4.81-1,192)	Limonene	ppbV	Median (range)	Proton-Transfer-Reaction Time-of-Flight Mass Spectrometry (PTR-TOF-MS)	Mass Spectrometry (direct injection)	Limonene
Novak et al., 2007	20	Normoglycemia: 8±1 pptv	NA	NA	~5 pptv	CH₃ONO₂ (Methyl nitrate)	pptv	Mean ± SD	Gas Chromatography (GC) with multiple detectors (MS, FID, ECD)	GC-MS / GC-Other Detectors	CH₃ONO₂ (Methyl nitrate) (pptv)	Description in text following Figure 1	Unit: pptv (parts per trillion by volume). Data Type: Primarily Mean ± SD, or Mean.
	20	Hyperglycemia: 15±2 pptv	NA	NA	~10 pptv	CH₃ONO₂ (Methyl nitrate)	pptv	Mean ± SD	Gas Chromatography (GC) with multiple detectors (MS, FID, ECD)	GC-MS / GC-Other Detectors	CH₃ONO₂ (Methyl nitrate) (pptv)
Obermeier et al., 2015	21	NA	NA	Median: ~76 mV (text: 73 mV); IQR: ~62-99 mV; Q1: ~62 mV; Q3: ~99 mV	Median: ~58 mV; IQR: ~45-68 mV; Q1: ~45 mV; Q3: ~68 mV	Total volatile aldehydes	mV	Median (IQR)	Electrochemical sensor array	Chemical sensor / e-nose	Unit: mV	Figure 6	Data Type: Sensor amplitude.
Yang et al., 2016	22	NA	NA	2.96±0.21 ppmv	Healthy Volunteer 1: 1.40±0.37 ppmv; HV2: 1.17±0.17 ppmv; HV3: 1.36±0.30 ppmv; Mean: 1.31 ppmv; Range: 1.17-1.40 ppmv	Acetone	ppmv	Mean ± SD	Dielectric Barrier Discharge Microplasma Emission Spectrometry (DBD-µPES)	Spectroscopy	ppmv	Table 2	Determined value of acetone concentration.
Khan et al., 2022	23	NA	NA	0.1 - 0.2	0.25 - 0.3	Limonene	(Dimensionless value)	Range	Comprehensive Two-Dimensional Gas Chromatography Time-of-Flight Mass Spectrometry (GCxGC-TOFMS)	GC-MS	Limonene, Normalized peak area (unitless)	Figure 2	p<0.0037; Subjects were pre-diabetic with insulin resistance.
	23	NA	NA	0.1 - 0.2	0.3 - 0.4	Undecane	(Dimensionless value)	Range	Comprehensive Two-Dimensional Gas Chromatography Time-of-Flight Mass Spectrometry (GCxGC-TOFMS)	GC-MS	Undecane		p=0.0023
	23	NA	NA	0.3	0.4 - 0.5	2,7-Dimethylundecane	(Dimensionless value)	Range	Comprehensive Two-Dimensional Gas Chromatography Time-of-Flight Mass Spectrometry (GCxGC-TOFMS)	GC-MS	2,7-Dimethylundecane		p=2.60E-05
Chien et al., 2017	24	NA	NA	1207.7±689.5 ppb	750.0±434.4 ppb	Acetone	ppb	Mean ± SD	Biochemical Gas Sensor (Biosniffer)	Chemical sensor / e-nose	Breath Acetone content (ppb)	Abstract	Healthy vs. T1DM: significant difference (p<0.001). Healthy vs. T2DM: significant difference (p<0.001). T1DM vs. T2DM: significant difference (p<0.01).
	24	1641.3±845.5 ppb	1121.0±604.8 ppb	NA	750.0±434.4 ppb	Acetone	ppb	Mean ± SD	Biochemical Gas Sensor (Biosniffer)	Chemical sensor / e-nose	Breath Acetone content (ppb)	Figure 4 and legend
	24	NA	NA	23.1±20.1 ppb	15.4±11.3 ppb	Isopropanol (IPA)	ppb	Mean ± SD	Biochemical Gas Sensor (Biosniffer)	Chemical sensor / e-nose	Breath Isopropanol (IPA) content	Abstract	Diabetic group showed a significant difference in breath isopropanol compared to the healthy group (p<0.01).
	24	18.3±10.0 ppb	23.9±21.3 ppb	NA	15.4±11.3 ppb	Isopropanol (IPA)	ppb	Mean ± SD	Biochemical Gas Sensor (Biosniffer)	Chemical sensor / e-nose	Breath Isopropanol (IPA) content	Figure 4 and legend	T1DM data extracted from figure. T2DM vs. Healthy: significant difference (p<0.01). No significant difference observed for Healthy vs. T1DM or T1DM vs. T2DM.
Tanda et al., 2014	25	NA	659 - 1009 ppbv	NA	Mean ± SD: 645.6±574.4 ppbv; Range: 152 to 1799 ppbv	Acetone	ppbv	Range, Mean ± SD	Gas chromatography combined with a semiconductor gas sensor	GC-Other Detectors	Exhaled acetone (ppbv)	Table 1 and Figure 4	Control group data from clinical data; T2DM data extracted from figure.
Lekha & Suchetha, 2018	26	9.2-14 ppm	1.89-4.29 ppm	NA	0.24-0.71 ppm	Acetone	ppm	Range	Chemiresistive sensor (MOS) array	Chemical sensor / e-nose	Acetone (ppm)	Table 1
Parmar et al., 2022	27	NA	NA	1.8 Hz to 2.2 Hz	1.0 Hz to 1.2 Hz	Acetone (main component) in VOC mixture	Hz	Range	Quartz Tuning Fork (QTF) sensor array	Chemical sensor / e-nose	PS sensor (Polystyrene): Response	Figure 8a	The relationship between the sensor's test value (change in resonance frequency) and VOCs is that VOCs interact with the polymer on the sensor surface, changing its physical properties, which leads to a measurable shift in the QTF's resonance frequency.
	27	NA	NA	5.5 Hz to 6.5 Hz	1.7 Hz to 2.3 Hz	Acetone (main component) in VOC mixture	Hz	Range	Quartz Tuning Fork (QTF) sensor array	Chemical sensor / e-nose	PS+CA sensor (Polystyrene + Cellulose Acetate)
	27	NA	NA	6.6 Hz to 7.8 Hz	2.5 Hz to 3.1 Hz	Acetone (main component) in VOC mixture	Hz	Range	Quartz Tuning Fork (QTF) sensor array	Chemical sensor / e-nose	PS+GF sensor (Polystyrene + reduced graphene oxide-Zinc Nickel ferrite)
Malysheva et al., 2018	28	NA	NA	4.4 µg/m³ to 19.3 µg/m³	1.1 µg/m³ to 1.7 µg/m³	Acetone	µg/m³	Range	Gas Chromatography-Photoionization Detector (GC-PID)	GC-Other Detectors	Acetone (µg/m³)	Figure 4 and Figure 5	This study compares students with a family history of diabetes to those without.
Saidi et al., 2018	29	NA	NA	0.01	0.01	Dichloromethane (CH₂Cl₂)	%	Percentage	e-nose (MOS sensor array) / GC-Quadrupole Time-of-Flight MS (GC/Q-TOF-MS)	Chemical sensor / e-nose / GC-MS	Dichloromethane (CH₂Cl₂)	Figure 4	Peak area percentage (%), representing the relative proportion of a specific VOC's peak area to the total peak area in the GC/Q-TOF-MS analysis.	HSLC (Healthy Subjects with Low Creatinine) was chosen as the control group for comparison.
	29	NA	NA	0.08	0.06	Methane, dichloronitro- (CHCl₂NO₂)	%	Percentage	e-nose (MOS array) / GC/Q-TOF-MS	Chemical sensor / e-nose / GC-MS	Methane, dichloronitro- (CHCl₂NO₂)
	29	NA	NA	0	0.17	1H-Pyrrole-3-carbonitrile (C₅H₄N₂)	%	Percentage	e-nose (MOS array) / GC/Q-TOF-MS	Chemical sensor / e-nose / GC-MS	1H-Pyrrole-3-carbonitrile (C₅H₄N₂)
	29	NA	NA	0.01	0.2	2-Methylpyridine, 6-nitro- (C₆H₆N₂O₂)	%	Percentage	e-nose (MOS array) / GC/Q-TOF-MS	Chemical sensor / e-nose / GC-MS	2-Methylpyridine, 6-nitro- (C₆H₆N₂O₂)
	29	NA	NA	0.24	0	Benzaldehyde, 4-(1-phenyl-2-propenoxy)- (C₁₆H₁₄O₂)	%	Percentage	e-nose (MOS array) / GC/Q-TOF-MS	Chemical sensor / e-nose / GC-MS	Benzaldehyde, 4-(1-phenyl-2-propenoxy)- (C₁₆H₁₄O₂)
	29	NA	NA	0.28	0.01	Toluene (C₇H₈)	%	Percentage	e-nose (MOS array) / GC/Q-TOF-MS	Chemical sensor / e-nose / GC-MS	Toluene (C₇H₈)
	29	NA	NA	0.08	0	Aniline (C₆H₇N)	%	Percentage	e-nose (MOS array) / GC/Q-TOF-MS	Chemical sensor / e-nose / GC-MS	Aniline (C₆H₇N)
	29	NA	NA	0.07	0	Carbonochloridic acid, 2-chloroethyl ester (C₃H₄Cl₂O₂)	%	Percentage	e-nose (MOS array) / GC/Q-TOF-MS	Chemical sensor / e-nose / GC-MS	Carbonochloridic acid, 2-chloroethyl ester (C₃H₄Cl₂O₂)
	29	NA	NA	0.07	0	Bicyclo[4.1.0]hepta-1,3,5-triene (C₇H₆)	%	Percentage	e-nose (MOS array) / GC/Q-TOF-MS	Chemical sensor / e-nose / GC-MS	Bicyclo[4.1.0]hepta-1,3,5-triene (C₇H₆)
	29	NA	NA	0	0.12	Cycloheptatrienylium, iodide (C₇H₇I)	%	Percentage	e-nose (MOS array) / GC/Q-TOF-MS	Chemical sensor / e-nose / GC-MS	Cycloheptatrienylium, iodide (C₇H₇I)
	29	NA	NA	0	0.32	Propanoyl chloride, 3-chloro- (C₃H₄Cl₂O)	%	Percentage	e-nose (MOS array) / GC/Q-TOF-MS	Chemical sensor / e-nose / GC-MS	Propanoyl chloride, 3-chloro- (C₃H₄Cl₂O)
	29	NA	NA	0	0.21	Ethenesulfonyl chloride (C₂H₃ClO₂S)	%	Percentage	e-nose (MOS array) / GC/Q-TOF-MS	Chemical sensor / e-nose / GC-MS	Ethenesulfonyl chloride (C₂H₃ClO₂S)
	29	NA	NA	0.03	0.03	Pentane, 3-methyl- (C₆H₁₄)	%	Percentage	e-nose (MOS array) / GC/Q-TOF-MS	Chemical sensor / e-nose / GC-MS	Pentane, 3-methyl- (C₆H₁₄)
	29	NA	NA	0.01	0.02	Chloroform (CHCl₃)	%	Percentage	e-nose (MOS array) / GC/Q-TOF-MS	Chemical sensor / e-nose / GC-MS	Chloroform (CHCl₃)
	29	NA	NA	0	0	Pentane, 3-ethyl- (C₇H₁₆)	%	Percentage	e-nose (MOS array) / GC/Q-TOF-MS	Chemical sensor / e-nose / GC-MS	Pentane, 3-ethyl- (C₇H₁₆)
	29	NA	NA	0	0	Silicon tetrafluoride (SiF₄)	%	Percentage	e-nose (MOS array) / GC/Q-TOF-MS	Chemical sensor / e-nose / GC-MS	Silicon tetrafluoride (SiF₄)
	29	NA	NA	0	0	4H-1,2,4-Triazol-4-amine (C₂H₄N₄)	%	Percentage	e-nose (MOS array) / GC/Q-TOF-MS	Chemical sensor / e-nose / GC-MS	4H-1,2,4-Triazol-4-amine (C₂H₄N₄)
	29	NA	NA	0	0	Styrene (C₈H₈)	%	Percentage	e-nose (MOS array) / GC/Q-TOF-MS	Chemical sensor / e-nose / GC-MS	Styrene (C₈H₈)
	29	NA	NA	0	0	Limonene (C₁₀H₁₆)	%	Percentage	e-nose (MOS array) / GC/Q-TOF-MS	Chemical sensor / e-nose / GC-MS	Limonene (C₁₀H₁₆)
	29	NA	NA	0.01	0	Methanesulfonyl chloride (CH₃ClO₂S)	%	Percentage	e-nose (MOS array) / GC/Q-TOF-MS	Chemical sensor / e-nose / GC-MS	Methanesulfonyl chloride (CH₃ClO₂S)
	29	NA	NA	0	0.03	2-Pyridinecarbonitrile (C₆H₄N₂)	%	Percentage	e-nose (MOS array) / GC/Q-TOF-MS	Chemical sensor / e-nose / GC-MS	2-Pyridinecarbonitrile (C₆H₄N₂)
	29	NA	NA	0	0.01	1H-Pyrazole-4-carbonitrile (C₄H₃N₃)	%	Percentage	e-nose (MOS array) / GC/Q-TOF-MS	Chemical sensor / e-nose / GC-MS	1H-Pyrazole-4-carbonitrile (C₄H₃N₃)
Smieja et al., 2023	30	NA	NA	Range: 0.5 - 0.8; Median: 0.55	Range: 0.3 - 0.5; Median: 0.4	Ammonia	(Dimensionless)	Range, Median	Chemical sensing (MOS sensor array)	Chemical sensor / e-nose	Ammonia (Sensor 1) (Dimensionless value after voltage signal normalization)	Table 1, Fig 6	Table 1 introduces the VOCs for each sensor; Fig 6 shows quantitative plots.
	30	NA	NA	Range: 0.3 - 0.5; Median: 0.38	Range: 0.2 - 0.4; Median: 0.28	Ethanol, Ammonia	(Dimensionless)	Range, Median	Chemical sensing (MOS sensor array)	Chemical sensor / e-nose	Sensor 2
	30	NA	NA	Range: 0.48 - 0.7; Median: 0.55	Range: 0.2 - 0.45; Median: 0.3	Nitric Oxide	(Dimensionless)	Range, Median	Chemical sensing (MOS sensor array)	Chemical sensor / e-nose	Sensor 3
	30	NA	NA	Range: 0.38 - 0.58; Median: 0.48	Range: 0.22 - 0.4; Median: 0.3	Acetone, Carbon Monoxide, Toluene, Benzene, Formaldehyde	(Dimensionless)	Range, Median	Chemical sensing (MOS sensor array)	Chemical sensor / e-nose	Sensor 4
	30	NA	NA	Range: 0.55 - 0.8; Median: 0.68	Range: 0.25 - 0.48; Median: 0.35	Acetone, Carbon Monoxide	(Dimensionless)	Range, Median	Chemical sensing (MOS sensor array)	Chemical sensor / e-nose	Sensor 5
	30	NA	NA	Range: 0.45 - 0.65; Median: 0.55	Range: 0.12 - 0.28; Median: 0.2	Acetone, Ethanol, Carbon Monoxide, Benzene	(Dimensionless)	Range, Median	Chemical sensing (MOS sensor array)	Chemical sensor / e-nose	Sensor 6
Tazi et al., 2019	31	NA	NA	PC1 score range (est.): ~-1.0 to +7.0 a.u., wide distribution. PC2 score range (est.): ~-3.5 to +1.5 a.u., concentrated in -2.5 to +0.5 a.u. region.	PC1 score range (est.): ~-0.5 to +3.0 a.u., concentrated in +0.0 to +2.5 a.u. region. PC2 score range (est.): ~+0.0 to +3.0 a.u., concentrated in +0.5 to +2.5 a.u. region.	Exhaled breath mixture	(Dimensionless)	Descriptive text (Principal Component scores)	e-nose (MQ gas sensor array)	Chemical sensor / e-nose	Model score (dimensionless)	Figure 2	The e-nose uses an array of 10 MQ sensors. The set of 10 sensor responses constitutes the raw quantitative data, which is related to the types and amounts of VOCs in the breath.
Sha et al., 2022	32	NA	NA	~2.5 - 2.8 ppm	~0.2 - 0.8 ppm	Acetone	ppm	Range	Colorimetric sensing	Chemical sensor / e-nose	Age 10-20; Breath acetone conc. (ppm)	Figure 9b
	32	NA	NA	~2.8 - 3.2 ppm	~0.2 - 0.8 ppm	Acetone	ppm	Range	Colorimetric sensing	Chemical sensor / e-nose	Age 20-30
	32	NA	NA	~3.1 - 3.5 ppm	~0.2 - 0.8 ppm	Acetone	ppm	Range	Colorimetric sensing	Chemical sensor / e-nose	Age 30-40
	32	NA	NA	~3.5 - 4.0 ppm	~0.2 - 0.8 ppm	Acetone	ppm	Range	Colorimetric sensing	Chemical sensor / e-nose	Age 40-50
	32	NA	NA	~3.9 - 4.4 ppm	~0.2 - 0.9 ppm	Acetone	ppm	Range	Colorimetric sensing	Chemical sensor / e-nose	Age 50-60
	32	NA	NA	~4.3 - 4.8 ppm	~0.3 - 0.9 ppm	Acetone	ppm	Range	Colorimetric sensing	Chemical sensor / e-nose	Age 60-70
	32	NA	NA	~4.6 - 5.1 ppm	~0.4 - 0.9 ppm	Acetone	ppm	Range	Colorimetric sensing	Chemical sensor / e-nose	Age 70-80
Yazdankhah et al., 2024	33	NA	NA	3.89 - 5.78 ppb	0.16 - 0.36 ppb	Acetone	ppb	Range	Needle Trap Device-Gas Chromatography-Flame Ionization Detection (NTD-GC-FID)	GC-Other Detectors	NTD-GC-FID	Table 4
	33	NA	NA	3.36 - 4.90 ppb	0.20 - 0.36 ppb	Acetone	ppb	Range	Headspace Solid-Phase Microextraction-Gas Chromatography-Flame Ionization Detection (HS-SPME-GC-FID)	GC-Other Detectors	HS-SPME-GC-FID; Breath acetone conc./ppb
Mansouri et al., 2020	34	NA	NA	NA	(No data)	(Dimensionless)	NA	Chemiresistive sensor (MOS) array	Chemical sensor / e-nose	NA		This article uses a regression model with three VOCs as inputs to estimate blood glucose. The model parameters differ for diabetic and healthy individuals, but it is not a study that distinguishes between groups based on the data.
Manchukutty et al., 2015	35	NA	NA	1.4 to 1.8 nA	0.3 to 0.7 nA	Acetone	nA (nanoamperes)	Range	Differential Mobility Spectrometry (DMS)	Mass Spectrometry (direct injection)	nA (nanoamperes)	Figure 12	VOC Type: Acetone. Quantitative Data Type: Sensor detector output, which is correlated with breath acetone concentration.
Samudrala et al., 2014	36	450 ppbv	400 ppbv	NA	480 ppbv	Acetone	ppbv	Median only	Proton-Transfer-Reaction Ion Trap Mass Spectrometry (PIT-MS)	Mass Spectrometry (direct injection)	Before walk	Figure 1b	VOC Type: Acetone. Quantitative Data Type: Breath acetone concentration.
	36	1050 ppbv (p<0.05)	500 ppbv	NA	600 ppbv, significantly increased after walk (p<0.05)	Acetone	ppbv	Median only	Proton-Transfer-Reaction Ion Trap Mass Spectrometry (PIT-MS)	Mass Spectrometry (direct injection)	After walk
Patel, 2011	37	NA	NA	500 ppb to 15000 ppb	NA	Acetone	ppb	Range	SIFT-MS / TD-GC-MS / Chemiresistive sensor	MS (direct injection) / GC-MS / Chemical sensor/e-nose	ppb	Figure 3.5	Exhaled acetone concentration quantified using H₃O⁺ precursor ions.
	37	NA	NA	1000 ppb to 21000 ppb	NA	Acetone	ppb	Range	SIFT-MS / TD-GC-MS / Chemiresistive sensor	MS (direct injection) / GC-MS / Chemical sensor/e-nose	ppb	Figure 3.6	Exhaled acetone quantified using NO⁺ precursor ions.
	37	NA	NA	100 ppb to 850 ppb	NA	Acetaldehyde	ppb	Range	SIFT-MS / TD-GC-MS / Chemiresistive sensor	MS (direct injection) / GC-MS / Chemical sensor/e-nose	ppb	Figure 3.7	Acetaldehyde
	37	NA	NA	200 ppb to 5800 ppb	NA	Ammonia	ppb	Range	SIFT-MS / TD-GC-MS / Chemiresistive sensor	MS (direct injection) / GC-MS / Chemical sensor/e-nose	ppb	Figure 3.8	Ammonia
	37	NA	NA	300 ppb to 1500 ppb	NA	Methanol	ppb	Range	SIFT-MS / TD-GC-MS / Chemiresistive sensor	MS (direct injection) / GC-MS / Chemical sensor/e-nose	ppb	Figure 3.9	Methanol
	37	NA	NA	200 ppb to 1500 ppb	NA	Ethanol	ppb	Range	SIFT-MS / TD-GC-MS / Chemiresistive sensor	MS (direct injection) / GC-MS / Chemical sensor/e-nose	ppb	Figure 3.10	Ethanol
	37	NA	NA	50 ppb to 1000 ppb	NA	Propanol	ppb	Range	SIFT-MS / TD-GC-MS / Chemiresistive sensor	MS (direct injection) / GC-MS / Chemical sensor/e-nose	ppb	Figure 3.11	Propanol
	37	NA	NA	0 ppb (or very close to 0) to 700 ppb	NA	Isoprene	ppb	Range	SIFT-MS / TD-GC-MS / Chemiresistive sensor	MS (direct injection) / GC-MS / Chemical sensor/e-nose	ppb	Figure 3.12	Isoprene
	37	NA	NA	200 ng L⁻¹ to 10000 ng L⁻¹	NA	Acetone	ng/L	Range	SIFT-MS / TD-GC-MS / Chemiresistive sensor	MS (direct injection) / GC-MS / Chemical sensor/e-nose	ng/L	Acetone (corresponds to Fig 3.30)
	37	NA	NA	0 to 50 ng L⁻¹	NA	Acetaldehyde	ng/L	Range	SIFT-MS / TD-GC-MS / Chemiresistive sensor	MS (direct injection) / GC-MS / Chemical sensor/e-nose	ng/L	Acetaldehyde (corresponds to Fig 3.31)
	37	NA	NA	0 to 50 ng L⁻¹	NA	Acetic Acid	ng/L	Range	SIFT-MS / TD-GC-MS / Chemiresistive sensor	MS (direct injection) / GC-MS / Chemical sensor/e-nose	ng/L	Acetic Acid (corresponds to Fig 3.32)
	37	NA	NA	0 to 20 ng L⁻¹	NA	2-Butanone	ng/L	Range	SIFT-MS / TD-GC-MS / Chemiresistive sensor	MS (direct injection) / GC-MS / Chemical sensor/e-nose	ng/L	2-Butanone (corresponds to Fig 3.33)
	37	NA	NA	0 to 50 ng L⁻¹	NA	Methanol	ng/L	Range	SIFT-MS / TD-GC-MS / Chemiresistive sensor	MS (direct injection) / GC-MS / Chemical sensor/e-nose	ng/L	Methanol (corresponds to Fig 3.34)
	37	NA	NA	0 to 40 ng L⁻¹	NA	Methylglyoxal	ng/L	Range	SIFT-MS / TD-GC-MS / Chemiresistive sensor	MS (direct injection) / GC-MS / Chemical sensor/e-nose	ng/L	Methylglyoxal (corresponds to Fig 3.35)
	37	NA	NA	0 to 50 ng L⁻¹	NA	Phenol	ng/L	Range	SIFT-MS / TD-GC-MS / Chemiresistive sensor	MS (direct injection) / GC-MS / Chemical sensor/e-nose	ng/L	Phenol (corresponds to Fig 3.36)
	37	NA	NA	0 to 3000 ng L⁻¹	NA	Propanol	ng/L	Range	SIFT-MS / TD-GC-MS / Chemiresistive sensor	MS (direct injection) / GC-MS / Chemical sensor/e-nose	ng/L	Propanol (corresponds to Fig 3.37)
	37	NA	NA	0 to 2000 ng L⁻¹	NA	Isoprene	ng/L	Range	SIFT-MS / TD-GC-MS / Chemiresistive sensor	MS (direct injection) / GC-MS / Chemical sensor/e-nose	ng/L	Isoprene (corresponds to Fig 3.38)
Jiang et al., 2016	38	Fasting: Mean 6.9±21.7 ppm (Range: 0.7-103.7 ppm)	Fasting: Mean 1.7±0.7 ppm (Range: 0.1-19.8 ppm)	NA	Fasting: Mean 1.3±0.3 ppm (Range: 0.3-1.9 ppm)	Acetone	ppm	Mean ± SD (Range)	Cavity Ring-Down Spectroscopy (CRDS)	Spectroscopy	Acetone (ppm)	Table 2, Figure 8
	38	2h post-breakfast: Mean 6.3±19.6 ppm (Range: 0.7-89.5 ppm)	2h post-breakfast: Mean 1.5±1.1 ppm (Range: 0.1-7.1 ppm)	NA	2h post-breakfast: Mean 0.9±0.5 ppm (Range: 0.1-2.0 ppm)	Acetone	ppm	Mean ± SD (Range)	Cavity Ring-Down Spectroscopy (CRDS)	Spectroscopy	Acetone (ppm)
	38	2h post-lunch: Mean 4.0±10.3 ppm (Range: 0.3-42.5 ppm)	2h post-lunch: Mean 1.4±1.0 ppm (Range: 0.1-7.2 ppm)	NA	2h post-lunch: Mean 1.0±0.6 ppm (Range: 0.1-2.0 ppm)	Acetone	ppm	Mean ± SD (Range)	Cavity Ring-Down Spectroscopy (CRDS)	Spectroscopy	Acetone (ppm)
	38	2h post-dinner: Mean 1.5±0.7 ppm (Range: 0.6-2.9 ppm)	2h post-dinner: Mean 1.5±1.3 ppm (Range: 0.1-10.6 ppm)	NA	2h post-dinner: Mean 1.1±0.4 ppm (Range: 0.3-1.4 ppm)	Acetone	ppm	Mean ± SD (Range)	Cavity Ring-Down Spectroscopy (CRDS)	Spectroscopy	Acetone (ppm)
Li et al., 2015	39	NA	Mean breath acetone: 1.75 ppmv; SE: ±0.21 ppmv; Range: 0.22-9.41 ppmv	NA	Mean breath acetone: 0.72 ppmv; SE: ±0.05 ppmv; Range: 0.32-1.96 ppmv	Acetone	ppmv	Mean ± SE (Range)	Solid-Phase Microextraction-Gas Chromatography-Mass Spectrometry (SPME-GC-MS)	Gas Chromatography-Mass Spectrometry (GC-MS)	Breath acetone (ppmv)	3.1 Main text

## Sheet: Sheet2
Study ID	RoB D1: Patient Selection	RoB D2: Index Test	RoB D3: Reference Standard	RoB D4: Flow and Timing	AC D1: Patient Selection	AC D2: Index Test	AC D3: Reference Standard
Mazzatenta, 2013	High (A typical case-control study with a very small sample size (N=6) and unspecified sampling method, leading to a high risk of selection bias.)	Unclear (It was not mentioned whether the test operators or data analysts were blinded to the patient group assignments.)	Low (The reference standard was clinical diagnosis supported by laboratory data, which is reliable.)	Low (All enrolled patients were included in the analysis, and the flow was complete.)	Low (The study population (T2DM vs. healthy controls) matches the review question.)	High (The MOS sensor used detects a total VOC signal (VOCe) rather than a specific biomarker (e.g., acetone). This is inconsistent with the technical approach of most other studies, making its data poorly applicable for direct comparison.)	Low (The reference standard (clinical diagnosis of T2DM) matches the review question.)
Phillips, 2004	High (A case-control study that recruited volunteers through clinics and advertisements, which constitutes convenience sampling, leading to a high risk of selection bias.)	Unclear (The text does not state whether the GC-MS analyst was blinded to the sample origins.)	Low (The reference standard was clinical diagnosis, which is reliable.)	Low (The study flow is clear, with no mention of unreasonable patient exclusions.)	Low (The study population (T1DM, T2DM, healthy controls) is highly relevant to the review topic.)	Low (The use of GC-MS is one of the gold standard methods for identifying and quantifying specific VOCs, making it highly applicable to the review question.)	Low (The reference standard (clinical diagnosis of diabetes) matches the review question.)
Greiter, 2010	High (A case-control study with a small sample size (N=20) and an unspecified recruitment method, leading to a high risk of selection bias.)	Unclear (It was not mentioned whether the PTR-MS operator was blinded to the subject group assignments.)	Low (The American Diabetes Association (ADA) diagnostic criteria were used as the reference standard, which is reliable.)	Low (All subjects completed the full study protocol, including the OGTT.)	Low (The study population (T2DM vs. healthy controls) matches the review question, and the groups were matched for age and BMI, indicating a rigorous design.)	Low (The use of PTR-MS, an advanced real-time mass spectrometry technique capable of detecting specific compounds, is highly applicable to the review question.)	Low (The reference standard (ADA criteria) matches the review question.)
Worrall, 2018	High (The study mentions "randomly recruited," but it is a case-control design, the specific randomization method is not described, and detailed baseline data is not provided. Thus, the overall risk of selection bias is judged as "High".)	Unclear (The text does not mention if the researchers performing the breath analysis or interpreting the absorbance results were aware of the patient group assignments (blinding).)	Low (The reference standard used a glucometer for blood glucose measurement, which is a widely accepted clinical reference.)	Low (All patients provided both breath and blood samples; the study flow was complete.)	Low (The study population was clearly defined as diabetic patients and healthy controls, matching the review question.)	Low (The use of a colorimetric sensor is a novel method aimed at directly detecting acetone, which is a relevant technical approach for the review question.)	Low (The reference standard (blood glucose concentration) is a core indicator for assessing diabetic status and is highly applicable.)
Goerl, 2013	Low (This was a prospective observational study with consecutive enrollment, which avoids subjective selection, resulting in a low risk of bias.)	Unclear (The text does not state whether the lab personnel performing the SPME-GC-MS analysis were blinded to the sample origins.)	Low (The reference standard (clinical diagnosis of diabetes) was established before the study began and is reliable.)	Low (The study collected and analyzed samples from all 30 patients at four time points, with a very clear flow and timing.)	High (The subjects were patients with end-stage renal disease (ESRD) undergoing hemodialysis (HD), a very specific population whose metabolic state differs greatly from that of typical diabetic patients, creating a high mismatch.)	Low (The use of HS-SPME-GC-MS is a gold standard method for identifying and quantifying specific VOCs and is highly applicable.)	Low (The classification by reference standard (presence of diabetes) is applicable to the review question.)
Kudo, 2021	High (This is a technical validation study, not a diagnostic accuracy study. It recruited only healthy adults without a disease group for comparison, making it impossible to assess bias in patient selection.)	Unclear (The text does not mention whether personnel performing the tests or interpreting the spectral data were blinded.)	N/A (No reference standard was used for diagnostic comparison.)	Low (Samples from all subjects were collected and analyzed; the flow was clear.)	High (The study population consisted only of healthy adults and did not include a diabetic patient group, creating a high mismatch for the review question.)	Low (The use of VUV spectroscopy is an advanced method for quantifying specific compounds (acetone), and the technical approach is relevant to the review question.)	N/A (No reference standard.)
Walton, 2014	Low (This was a prospective intervention study (hypoglycemic clamp test) that included all eligible individuals without subjective selection, resulting in a low risk of selection bias.)	Unclear (The text does not mention if the personnel were blinded to the patient's glycemic stage during the clamp test.)	Low (The reference standard was plasma glucose concentration measured with a YSI analyzer, a high-precision reference.)	Low (The study flow was very clear, with all volunteers providing samples at each stage and no reports of dropouts or missing data.)	Low (The subjects were T1DM patients, which is highly relevant to the review question.)	Low (The study used two relevant techniques (a portable sensor and SIFT-MS), both aimed at detecting VOCs associated with diabetes, making them highly applicable.)	Low (The reference standard (plasma glucose concentration) is a core indicator for monitoring diabetic status and is highly applicable.)
Grabowska-Polanowska, 2017	High (A typical case-control study where researchers recruited patient and healthy control groups from different settings. The age mismatch between groups could also introduce confounding bias.)	Unclear (It was not mentioned whether the lab personnel performing the GC/MS analysis were blinded to the sample origins.)	Low (The reference standard was clinical diagnosis, which is reliable.)	Low (The study flow was clear, and all enrolled subjects provided samples and were included in the analysis.)	High (The primary focus of this study was chronic kidney disease (CKD), with one group happening to have comorbid T2DM. This population's metabolic state differs significantly from typical T2DM patients, creating a high mismatch.)	Low (The use of GC/MS is a gold standard method for identifying and quantifying specific VOCs and is highly applicable.)	Low (The classification by reference standard (presence of T2DM) is applicable to the review question.)
Xing, 2015	High (This is a technical study focused on developing a new sensor, which includes a very small clinical validation (11 diabetic and 6 healthy volunteers). It is a case-control design, and the paper completely omits any description of how these volunteers were selected or recruited, leading to a very high risk of selection bias.)	Unclear (There is no mention of whether the operator of the new sensor was blinded to the status (healthy or diabetic) of the volunteers.)	Unclear (This is a major flaw. The paper does not describe the reference standard used to classify volunteers as "diabetic" or "healthy." We do not know how the diagnosis was made or confirmed (e.g., clinical diagnosis, blood test, or self-report). Therefore, the reliability of the reference standard cannot be assessed.)	Low (It appears that data from all 17 volunteers were used in the analysis.)	Low (The study population (diabetic vs. healthy) is applicable to the review question.)	Low (The newly developed sensor is designed to detect acetone, which is highly applicable to the review question.)	Unclear (Because the reference standard is not described, we cannot determine its applicability to your review question (e.g., we do not know if the patients were T1DM or T2DM).)
Iscan, 2020	High (This is a typical case-control study. The paper does not specify the recruitment method (e.g., consecutive or random) for patients and healthy controls, posing a high risk of selection bias.)	Low (One of the index tests, the Halimeter, provides objective ppb readings. For the highly subjective organoleptic assessment, the study took rigorous precautions: it was performed by a single, calibrated, and blinded examiner, which significantly reduces the risk of bias.)	Low (The reference standard for group allocation was a prior clinical diagnosis of T1DM, which is reliable. The reference standards for oral health (e.g., DMFT, ICDAS II) are international standards and were applied by a calibrated examiner.)	Low (All 100 children enrolled were included in the final analysis, indicating a complete study flow.)	Low (The study population (children with T1DM vs. healthy controls) is relevant to your review's topic.)	High (The index test in this study focuses on halitosis, measuring Volatile Sulfur Compounds (VSCs). This is fundamentally different, in both biological origin and chemical class, from the core focus of your review, which is the detection of VOCs (like acetone) originating from systemic metabolic disturbances.)	Low (The reference standard (clinical diagnosis of T1DM) is applicable to your review question.)
Gudiño-Ochoa, 2024	High (This is a case-control study with 44 participants (22 healthy, 22 with diabetes). The paper does not specify the recruitment method, leading to a high risk of selection bias.)	High (This is a critical source of bias in e-nose studies. The machine learning model was trained and tested on the same dataset. This creates a high risk of the model overfitting to the existing data. The reported accuracy (95%) is likely to be optimistic and may decrease significantly when applied to a new, independent population.)	Low (A glucometer was used to measure blood glucose levels (BGL) to confirm the health status of participants, which is a reliable and accepted reference standard.)	Low (Data from all 44 participants were used in the analysis, indicating a complete flow.)	Low (The study population (diabetic vs. healthy) is applicable to the review question.)	Low (The e-nose is an important detection technology in this field and is applicable to the review question.)	Low (A glucometer is an applicable reference standard for diagnosing and classifying diabetic status.)
Ghimenti, 2013	Low (This is a prospective cohort study. It enrolled subjects scheduled for an OGTT and classified them after the test. This design avoids the selection bias typical of case-control studies.)	Unclear (The paper does not state whether the laboratory personnel performing the TD-GC/MS analysis were blinded to the subjects' OGTT group assignments.)	Low (The reference standard was the OGTT, which is the gold standard for diagnosing and classifying glucose tolerance status and is highly reliable.)	Low (The study protocol is clear, with all 16 subjects providing samples at five time points.)	Low (The study population covers the entire spectrum from normoglycemic to diabetic, which is very valuable for exploring biomarker changes and is highly applicable.)	Low (The use of TD-GC/MS is one of the gold-standard methods for VOC analysis and is highly applicable to the review question.)	Low (The OGTT is one of the most authoritative methods for diagnosing diabetes, making it a highly applicable reference standard.)
Yu, 2019	High (This is a typical case-control study. Healthy volunteers were recruited from a university, while diabetic patients were from an affiliated hospital. This convenience sampling from different populations likely introduces systematic differences, leading to a high risk of selection bias.)	Unclear (The paper does not mention whether the personnel performing the TD-GC analysis were blinded to the sample origin.)	Unclear (This is a major flaw. The paper fails to describe the reference standard used to define the "diabetic" and "healthy" groups. We do not know how the diagnosis was confirmed, so its reliability cannot be assessed.)	Low (All 32 subjects appear to have provided samples and been included in the analysis.)	Low (The study population (diabetic vs. healthy) is applicable to the review question.)	Low (The method is designed to detect acetone and isopropanol, which are diabetes-related VOCs, making the technical approach applicable.)	Unclear (Since the reference standard is not described, its applicability cannot be confirmed.)
Fink, 2022	Low (This is a prospective observational cohort study. It consecutively enrolled 60 diabetic patients without subjective selection. The study had reasonable exclusion criteria, helping to form a more homogeneous study group. Therefore, the risk of selection bias is low.)	Unclear (The paper does not mention whether the personnel processing and analyzing the PTR-TOF-MS data were blinded to the corresponding BGL trends for each sample.)	Low (The reference standard was a commercially available and validated blood glucose meter (Accu-Chek Guide), which is a reliable and widely accepted reference.)	Low (The study protocol is very clear, with parallel sampling performed every 15 minutes for 6 hours for each subject.)	Low (The study population (T1DM and T2DM patients) is highly consistent with your review question.)	Low (The use of PTR-TOF-MS is an advanced and highly applicable real-time online analysis technique for VOCs.)	Low (The use of BGM as the reference standard is highly applicable to your review question.)
Yucel, 2018	High (This is a technical study with a case-control design (10 healthy vs. 10 prediabetic). The recruitment method is not specified, leading to a high risk of selection bias.)	Unclear (The paper does not mention whether the researchers were blinded to the volunteers' group status.)	N/A (The study's aim was not to diagnose but to differentiate between two known groups. Therefore, a traditional reference standard for diagnostic accuracy is not applicable.)	Low (Samples from all 20 volunteers were collected and analyzed.)	Low (The study population (healthy vs. prediabetic) is highly relevant to the theme of diabetes screening.)	Low (The nanofiber-based sensor is designed to detect acetone, a technology highly relevant to the review question.)	N/A (No diagnostic reference standard was used.)
Aleksić, 2023	High (This is an exploratory case-control study that recruited multiple distinct groups through convenience sampling, which carries a high risk of selection bias.)	Unclear (The paper does not mention whether the personnel performing the MIMS analysis were blinded to the group status of the samples.)	Unclear (This is a major flaw. The paper does not specify the reference standard used to confirm or quantify disease status for this study. Therefore, the reliability of the reference standard cannot be assessed.)	Low (The study protocol is clear, with all 151 participants providing pre-meal and post-meal samples as required.)	High (The study includes multiple groups with different health conditions and lifestyles, resulting in a highly heterogeneous population, which raises high applicability concerns for a review focused solely on diabetes.)	Low (The use of a portable mass spectrometer (MIMS) is an applicable technological approach for VOC detection.)	Low (The reference standard (a clinical diagnosis of T2DM) is conceptually applicable, even though its specific implementation was not reported.)
Yoshinaga, 2024	High (This is a technical validation study. The breath analysis portion only included 3 subjects (the authors). This is a small, non-representative convenience sample, which carries a very high risk of selection bias.)	Unclear (The paper does not mention if the data analysts were blinded to the sample origin.)	Low (Although not a diagnostic accuracy study, the measured acetone concentrations were compared against HbA1c values. HbA1c measurement is a reliable reference standard.)	Low (Samples from all three subjects were collected and analyzed.)	High (The study subjects were only three healthy individuals and did not include any diabetic patients. Therefore, the population has high applicability concerns for your review question.)	Low (The femtosecond laser ionization mass spectrometry used is an advanced VOC analysis technique and is applicable to the review topic.)	Low (Comparing breath test results to HbA1c is an applicable method for assessing diabetic status.)
Trefz, 2019	High (This is a cross-sectional case-control study. Although the study matched groups for age and sex (a strength), it does not detail the specific sampling method (e.g., consecutive recruitment), so the risk of selection bias remains.)	Unclear (It is not mentioned whether the personnel performing the PTR-TOF-MS analysis were blinded to the group status of the samples.)	Low (The reference standard for the T1DM group was a clinical diagnosis supported by a C-peptide level (<0.3 nmol/l), which is a reliable diagnostic basis.)	Low (All enrolled subjects provided samples and were included in the analysis.)	Low (The study population (children with T1DM vs. healthy controls) is highly relevant to your review topic.)	Low (The use of PTR-TOF-MS is an advanced technique suitable for real-time online analysis of VOCs and is highly applicable.)	Low (The clinical diagnostic criteria for T1DM constitute an applicable reference standard.)
Novak, 2007	Low (This is a well-designed prospective experimental study. The subjects were a cohort of children with T1DM to explore the relationship between VOCs and glucose changes, not for diagnosis. The inclusion criteria are clear, thus the risk of selection bias is low.)	Unclear (The paper does not mention whether the lab personnel performing the GC analysis were blinded to the blood glucose levels or experimental phase at the time of sample collection.)	Low (The reference standard was a laboratory-grade glucose analyzer (Beckman Glucose Analyzer II) using the glucose oxidase method, which is a gold standard.)	Low (The study protocol is very clear, with matched breath and blood samples taken for each subject under different glycemic conditions. All experiments are fully reported.)	Low (The study population (children with T1DM) is highly relevant to your review question.)	Low (The multi-column/multi-detector gas chromatography system used is a powerful and applicable technique for VOC analysis.)	Low (The reference standard (plasma glucose concentration) is the core metric for monitoring glycemic status and is highly applicable.)
Obermeier, 2015	High (This is a technical development paper with a case-control design (15 diabetic vs. 14 healthy). The paper does not describe the recruitment method, leading to a high risk of selection bias.)	Unclear (The paper does not mention whether the personnel operating the electrochemical sensor were blinded to the group status of the subjects.)	Unclear (This is a major flaw. The paper does not describe the reference standard used to define the groups. Its reliability cannot be assessed.)	Low (All enrolled subjects appear to have provided samples and been included in the analysis.)	Low (The study population (diabetic vs. healthy control) is applicable to your review question.)	High (The sensor is designed to detect total aldehydes, explicitly stating negligible cross-sensitivity to acetone. This is fundamentally different from the review's focus on ketones like acetone.)	Unclear (As the reference standard was not described, its applicability cannot be determined.)
Yang, 2016	High (This is a technical study with a very small clinical validation (1 diabetic vs. 3 healthy). This is a case-control design with an extremely small sample size and no description of the recruitment process, leading to a very high risk of selection bias.)	Unclear (The paper does not mention whether the personnel operating the DBD-OES system were blinded to the sample origin.)	Unclear (This is a major flaw. The paper completely omits what reference standard was used to define these groups. Its reliability cannot be assessed.)	Low (Samples from all 4 volunteers were collected and analyzed.)	Low (The study population (diabetic vs. healthy) is applicable to the review question.)	Low (The newly developed DBD-OES technology is intended for acetone detection, which is applicable.)	Unclear (As the reference standard is not described, its applicability cannot be determined.)
Khan, 2022	Low (This is a cross-sectional study that recruited a specific cohort (obese Hispanic adolescents) and subsequently grouped them based on HOMA-IR values. It involves internal grouping within a cohort, which results in a low risk of selection bias.)	High (Similar to other machine learning studies, this research used the same dataset to train and test the model. This carries a high risk of data-driven bias and overfitting. The reported AUC-ROC of 0.87 might be lower when applied to a new population.)	Low (The reference standard is HOMA-IR, which is calculated from fasting insulin and glucose. This is an accepted and reliable index for assessing insulin resistance.)	Low (Samples from all 28 participants were collected and analyzed, and the flow is clear.)	Low (The study population consists of adolescents who are "obese and pre-diabetic." This group is very valuable for studying early biomarkers of diabetes and is highly applicable.)	Low (The use of TD-GCxGC-TOFMS for breath analysis combined with a machine learning model represents a state-of-the-art and highly applicable technical approach.)	Low (Using HOMA-IR as the reference standard is highly applicable for studying insulin resistance.)
Chien, 2017	High (This is a case-control study. Healthy volunteers were from the university, while patients were from the university hospital's diabetes department. This convenience sampling from different populations likely leads to systematic differences, posing a high risk of selection bias.)	Unclear (The paper does not mention whether the personnel operating the "biosniffer" were blinded to the origin of the samples.)	Low (Although not detailed, the paper states patients were recruited from the hospital's diabetes department under regular check-ups, implying their diagnoses were based on reliable clinical routine.)	Low (The number of samples for all participants is reported, and the flow is clear.)	Low (The study population (T1DM, T2DM vs. healthy) is highly applicable to the review question.)	Low (The "biosniffer" is a novel enzymatic biosensor technology designed to detect acetone and isopropanol, which is highly applicable.)	Low (The reference standard (clinical diagnosis) is applicable.)
Tanda, 2014	Low (This is a prospective cohort study that enrolled 10 healthy volunteers for an OGTT. Its purpose is to observe biomarker changes during a physiological process, not for diagnosis. Therefore, the typical risk of selection bias is absent.)	Unclear (The paper does not mention whether the personnel operating the portable gas chromatograph were blinded to the time point or blood glucose level of the subjects during the OGTT.)	Low (The reference standard involved measuring plasma glucose via the glucose-oxidase method and plasma ketones via enzymatic methods at a clinical facility, which are highly reliable.)	Low (The study protocol is very clear, with all 10 volunteers completing sampling at all specified time points.)	Low (The study population (healthy volunteers) serves as an important control for understanding the baseline behavior of diabetes biomarkers, making it highly applicable.)	Low (The portable gas chromatograph used was designed to detect acetone, which is highly applicable.)	Low (The reference standards (plasma glucose and ketones) are core metrics for evaluating diabetic metabolic status and are highly applicable.)
Lekha, 2018	High (This is a case-control study that enrolled 25 subjects. The paper does not provide specific recruitment criteria or procedures, leading to a high risk of selection bias.)	High (The study used the same dataset to train and test its Convolutional Neural Network (CNN) model, which introduces a high risk of data-driven bias and overfitting.)	Low (The grouping of subjects was based on prior clinical diagnosis, supported by reported HbA1c ranges. This can be considered a reliable reference standard.)	Low (Samples from all 25 subjects were collected and analyzed.)	Low (The study population (T1DM, T2DM vs. healthy) is highly applicable to the review question.)	Low (The use of an MOS sensor array and a CNN algorithm is a highly applicable technical approach.)	Low (The reference standard (clinical diagnosis supported by HbA1c) is applicable.)
Parmar, 2022	High (This is a case-control study. The paper states the diabetic group was "self-declared," which is a major flaw. Additionally, the recruitment method is not specified, leading to a high risk of selection bias.)	High (The study used the same dataset to train and test the neural network model, which carries a high risk of data-driven bias and overfitting.)	Unclear (This is a major flaw. The diabetic group was based on "self-declaration," and no objective reference standard was provided to verify this grouping.)	Low (Samples from all 70 participants appear to have been used in the analysis.)	Low (The study population (diabetic vs. basal, etc.) is applicable to the review question.)	Low (The quartz tuning fork (QTF) sensor array used is intended to distinguish breath signatures and is applicable.)	Unclear (Because the reference standard is "self-declared" and unverified, its applicability cannot be determined.)
Malysheva, 2018	High (This is a case-control study recruiting 20 T2DM patients and 20 healthy controls. The recruitment process is not described, implying convenience sampling and a high risk of selection bias.)	Unclear (It is not mentioned whether the personnel operating the portable gas chromatograph were blinded to the group status of the subjects.)	Low (The reference standard was a T2DM diagnosis "established in a specialized medical institution," which is considered a reliable reference.)	Low (All 40 subjects were included in the analysis, indicating a complete flow.)	Low (The study population (T2DM vs. healthy) is directly applicable to your review question.)	Low (The use of a portable gas chromatograph for breath analysis is applicable.)	Low (The reference standard (clinical diagnosis) is applicable.)
Saidi, 2018	High (This is a typical case-control study. The paper does not specify the recruitment method, leading to a high risk of selection bias.)	Unclear (The paper does not mention if the operators were blinded. For the e-nose, the model was trained and validated on the same small dataset, which may lead to overfitting.)	Low (The inclusion criterion for the T2DM group was a fasting blood sugar > 1.26 g/L, which is a reliable diagnostic basis.)	Low (All 45 participants were included in the analysis.)	High (The study includes CKD patients. For a review focusing solely on "diabetes vs. healthy," the inclusion of CKD, a metabolically distinct group, reduces the direct applicability of the results.)	Low (The use of both an e-nose and GC-MS are highly relevant technical approaches.)	Low (The diagnostic criteria for T2DM are applicable.)
Smieja, 2023	N/A (Inherited) (This is a secondary analysis paper that did not recruit new subjects but used an existing dataset (primarily from Saidi et al., 2018). Therefore, the risk of bias in patient selection is inherited from the original study.)	High (This is the main source of bias for this study. The kNN model was developed and tested on a very small dataset (116 instances), which carries a very high risk of overfitting. The reported 97% accuracy is likely optimistic.)	N/A (Inherited) (The reference standard (the labels "healthy" or "diabetic") was taken directly from the original dataset.)	Low (All instances from the dataset were used in the analysis.)	High (Inherited) (Applicability concerns are also inherited. The original dataset (Saidi et al., 2018) included CKD patients. The composition of the final 116 samples is not detailed sufficiently, creating uncertainty.)	Low (Applying a kNN classifier to e-nose data is an applicable methodology.)	N/A (Inherited) (Inherited from the original data.)
Tazi, 2019	High (This is a case-control study that recruited 60 subjects via convenience sampling from a hospital clinic, posing a high risk of selection bias.)	High (The machine learning model (PNN) was trained and tested on the same small dataset (60 subjects), which carries a high risk of overfitting.)	Unclear (Diabetic status was based on a "physician's diagnosis," but specific criteria were not provided. Halitosis status was determined by a subjective "organoleptic score" from a dentist who was not specified to be blinded.)	Low (All 60 subjects were included in the analysis.)	Low (The study population (diabetic vs. non-diabetic) is applicable.)	High (The primary application of the e-nose was to classify bad breath (halitosis), not to directly reflect the systemic metabolic state of diabetes. This does not align with your review's core focus.)	High (The key reference standard for the index test was the organoleptic score for halitosis, not the diagnosis of diabetes, which does not match your research question.)
Sha, 2022	High (This is a typical case-control study (10 DKA patients vs. 11 healthy controls). The paper does not specify the recruitment method, leading to a high risk of selection bias that could exaggerate group differences.)	Unclear (The paper does not mention if the SIFT-MS analysts were blinded to the group status.)	Low (The reference standard is very clear and reliable. DKA diagnosis was based on explicit clinical and laboratory criteria.)	Low (All 21 participants were included in the analysis.)	High (The study population consists of patients with DKA, an acute metabolic crisis, which is very different from the population of interest for routine diabetes screening.)	Low (The use of SIFT-MS for breath VOC analysis is a highly relevant technology.)	High (The reference standard is for DKA, not for diabetes in general, which does not fully align with your primary research question.)
Yazdankhah, 2024	High (This is a typical case-control study. Although the groups were matched for age and sex, the paper does not specify the sampling method. Therefore, the risk of selection bias is judged as "High".)	Unclear (It is not mentioned whether the personnel performing the SPME-GC-MS analysis were blinded to the group status.)	Low (The reference standard is highly reliable, based on clear American Diabetes Association (ADA) criteria.)	Low (All 70 participants were included in the analysis.)	Low (The study population (T2DM vs. healthy controls) is highly applicable.)	Low (The use of SPME-GC-MS for VOC analysis is a gold-standard method that is highly applicable.)	Low (The ADA diagnostic criteria are a highly applicable reference standard.)
Mansouri, 2020	High	Low	Low	Low	Low	Low	Low
Manchukutty, 2015	High (This is a technical paper using samples from only four healthy volunteers. This is a small convenience sample and not a diagnostic accuracy study design, thus the risk of selection bias is "High".)	Unclear (The paper does not mention if the operators were blinded to the sample origins.)	N/A (No reference standard for diagnosing a disease was used, as there was no patient group.)	Low (Samples from all four volunteers were analyzed.)	High (The study subjects were only healthy volunteers and did not include a diabetic patient group. Therefore, the population has a high applicability concern.)	Low (The described differential mobility sensor (DMS) is designed to detect trace gases like acetone, making it a relevant technology.)	N/A (No reference standard was used.)
Samudrala, 2014	Low (This is an exploratory, prospective interventional study on a cohort of 10 healthy volunteers. Its purpose is to monitor changes within individuals, not to distinguish cases from controls. Therefore, the risk of traditional selection bias is low.)	Unclear (The paper does not mention whether the operators were blinded to the intervention phase of the subjects.)	N/A (The study is not diagnosing a disease, so there is no diagnostic reference standard. It measures blood glucose and ketones as biological correlates, but not for testing diagnostic accuracy.)	Low (The study flow clearly describes the protocol for all 10 volunteers over the multi-day study.)	High (The study population consists only of healthy volunteers undergoing lifestyle interventions, not diabetic patients. Therefore, the population has a high applicability concern.)	Low (The portable acetone analyzer used is a relevant detection technology.)	N/A (No diagnostic reference standard was used.)
Patel, 2011	High (This is a case-control study from a doctoral dissertation. The recruitment method was likely convenience sampling, and strategies to avoid selection bias are not detailed, thus the risk is "High".)	Unclear (The dissertation does not mention if operators were blinded to the sample origins. In a PhD study, the operator is typically aware of the sample status.)	Unclear (This is a major weakness. The dissertation does not detail the reference standard used to confirm diagnoses. Therefore, its reliability cannot be assessed.)	Low (The dissertation appears to include data from all recruited subjects.)	Low (The study population (diabetics vs. healthy) is applicable.)	Low (The sensor technology used is designed for VOC detection and is applicable.)	Unclear (As the reference standard is not described in detail, its applicability cannot be fully determined.)
Jiang, 2016	High (This is a typical case-control study (12 T1DM vs. 11 healthy). The paper does not specify the recruitment method, leading to a high risk of selection bias.)	Unclear (The paper does not mention whether the operators were blinded to the group status.)	Low (The reference standard involved measuring blood glucose with a commercial glucometer (OneTouch Ultra) and providing HbA1c values, which is reliable.)	Low (All 23 participants were included in the analysis.)	Low (The study population (T1DM vs. healthy controls) is highly applicable.)	Low (The CRDS analyzer used is designed for acetone detection, a highly relevant technology.)	Low (The reference standard (blood glucose measurement) is a core metric for assessing diabetic status.)
Li, 2015	High (This is a case-control study with multiple groups. Patients were recruited from a hospital, and the specific sampling method is not mentioned, leading to a high risk of selection bias.)	Unclear (The paper does not state whether the SIFT-MS analysts were blinded to the diagnostic group of the samples.)	Low (The reference standard was based on World Health Organization (WHO) criteria for diabetes and DKA, which is objective and reliable.)	Low (Data from all participants appear to be included in the analysis.)	High (The study includes multiple distinct patient groups (DKA, liver disease). For a review focusing on diabetes mellitus vs. healthy, the inclusion of these metabolically different groups complicates the direct applicability of the findings.)	Low (The use of SIFT-MS for breath analysis is a highly applicable method.)	Low (The WHO criteria are an applicable reference standard.)

## Sheet: Sheet3
Study	Groups & Sample Size (n)	Total N	Age (years)	Inclusion Criteria	Medication Status	Pre-sampling Conditions	Gas Sample Type	Collection & Storage	Analytical Instrument	Sample Pre-processing	Statistical Test	Reported p-value	Core Acetone-Related Finding
Goerl et al., 2013	Diabetes (10) vs. Non-diabetes (20)	30	39-85	End-stage renal disease (ESRD) patients on hemodialysis	Diabetic patients were insulin-dependent	During hemodialysis	Alveolar gas (CO₂ monitored)	Glass syringe -> sealed glass vial (immediate analysis)	GC-MS	SPME (Solid-Phase Microextraction)	Friedman test (for trends); no inter-group comparison	NR	Variability difference: Acetone concentration in the diabetic group had significantly lower variability than the non-diabetic group, not a difference in the concentration level itself.
Ghimenti et al., 2013	DM (5) vs. IGT (8) vs. Normal (3)	16	35-76 (mean 60)	Subjects undergoing an Oral Glucose Tolerance Test (OGTT)	Not reported	Overnight fasting	Mixed expired air	Nalophan bag (incubated at 40°C for 30 min)	GC-MS	TD (Thermal Desorption)	Agglomerative Hierarchical Clustering (AHC)	NR	Indistinguishable: Due to large inter-individual variability, acetone alone could not distinguish the three groups.
Chien et al., 2017	T1DM (4) vs. T2DM (21) vs. Healthy (55)	80	Groups not age-matched, significant difference exists	Outpatient diabetics and healthy volunteers	Most diabetic patients on medication	15 min rest, smoking/drinking restricted	Alveolar gas (15s breath-hold, discard first portion)	Sampling bag (immediate analysis)	Biosniffer	None (direct analysis)	Student's t-test	p < 0.001	Significant: Acetone concentrations in both T1DM and T2DM patients were significantly higher than in healthy controls.
Lekha and Suchetha, 2018	T1DM (5) vs. T2DM (9) vs. Healthy (11)	25	Healthy 20-38; T2DM 35-50; T1DM 22-29	Machine learning study, small sample size	Not reported	Not reported (only breath-hold required)	Gas blown into a chamber	Sensor chamber (real-time online analysis)	Electronic nose (e-nose)	None (direct analysis)	Machine Learning (CNN)	NR	Distinguishable: CNN classifier accuracy ~98%, and acetone concentration ranges for the groups showed no overlap, indirectly proving a large difference.
Sha et al., 2022	Trendline comparison	35	10-80	35 subjects, group numbers not specified	Mentioned 5 patients taking metformin	Not specified in detail	Not specified in detail	Real-time online analysis	Colorimetric sensor	None (direct analysis)	No inter-group comparison performed	NR	Distinguishable: Charts visually demonstrate a large difference in acetone concentration trendlines between diabetic and healthy individuals.
Li et al., 2015	T2DM (113) vs. Healthy (56)	169	T2DM mean 48; Healthy age not reported	T2DM patients and healthy controls	Not specified in detail	8-hour fasting	Alveolar gas (discard first portion)	Aluminum foil bag (analyzed within 5 days, stability verified)	GC-MS	SPME (Solid-Phase Microextraction)	Mann-Whitney U test	p = 0.008	Significant: Acetone concentration in T2DM patients was significantly higher than in healthy controls.
